# Supplementary material for: Integrative network analysis of early-stage lung adenocarcinoma identifies aurora kinase inhibition as interceptor of invasion and progression
Source: PubMed Central journal article supplement (PMC8948234; doi:10.1038/s41467-022-29230-7), 2022-03-24
Supplement: 41467_2022_29230_MOESM1_ESM.pdf [file 41467_2022_29230_MOESM1_ESM.pdf]

## Supplementary Information for

# Integrative Network Analysis of Early-Stage Lung Adenocarcinoma Identifies Aurora Kinases Inhibition as Interceptor of Invasion and Progression

Seungyeul Yoo<sup>1,2,3,#</sup>, Abhilasha Sinha<sup>4,5,#</sup>, Dawei Yang<sup>4,5,6</sup>, Nasser K. Altorki<sup>7</sup>, Radhika Tandon<sup>8</sup>, Wenhui Wang<sup>1,2</sup>, Deebly Chavez<sup>4</sup>, Eunjee Lee<sup>1,2,3</sup>, Ayushi S. Patel<sup>4,5,9</sup>, Takashi Sato<sup>4,5,10,11</sup>, Ranran Kong<sup>4,5,12</sup>, Bisen Ding<sup>4,13</sup>, Eric E. Schadt<sup>1,2,3,5</sup>, Hideo Watanabe<sup>1,2,4,5</sup>, Pierre P. Massion<sup>14,^</sup>, Alain C. Borczuk<sup>15</sup>, Jun Zhu<sup>1,2,3,5,\*</sup>, and Charles A. Powell<sup>4,5,\*</sup>

# These authors contributed equally

\*These authors jointly supervised this work

^ Deceased

Contacts: [jun.zhu@mssm.edu](mailto:jun.zhu@mssm.edu), [charles.powell@mssm.edu](mailto:charles.powell@mssm.edu)

1. Department of Genetics and Genomic Sciences, Icahn School of Medicine at Mount Sinai, New York, NY, USA
2. Icahn Institute for Data Science and Genomic Technology, New York, NY, USA
3. Sema4, Stamford, CT, USA
4. Division of Pulmonary, Critical Care and Sleep Medicine, Icahn School of Medicine at Mount Sinai, New York, NY, USA
5. Tisch Cancer Institute, Icahn School of Medicine at Mount Sinai, New York, NY, USA
6. Department of Pulmonary and Critical Care Medicine, Zhongshan Hospital, Fudan University, Shanghai, China.
7. Department of Cardiothoracic Surgery, Weill Cornell Medicine-New York Presbyterian Hospital, New York, NY, USA
8. School of Medicine, St. George's University, West Indies, Grenada
9. Vileck Institute of Graduate Biomedical Sciences, New York University School of Medicine, New York, NY, USA
10. Division of Pulmonary Medicine, Department of Medicine, Keio University School of Medicine, Tokyo, Japan
11. Department of Respiratory Medicine, Kitasato University School of Medicine, Sagamihara, Japan
12. Department of Thoracic Surgery, The Second Affiliated Hospital of Medical School, Xi'an Jiaotong University, Xi'an, Shaanxi, China
13. Key Laboratory of Birth Defects And Related Diseases of Women And Children of MOE, State Key Laboratory of Biotherapy, West China Second University Hospital, Sichuan University, Chengdu, Sichuan, China.
14. Department of Medicine, Vanderbilt University Medical Center, Nashville, TN, USA
15. Department of Pathology, Weill Cornell Medicine, New York, NY, USA

## Supplementary Figures

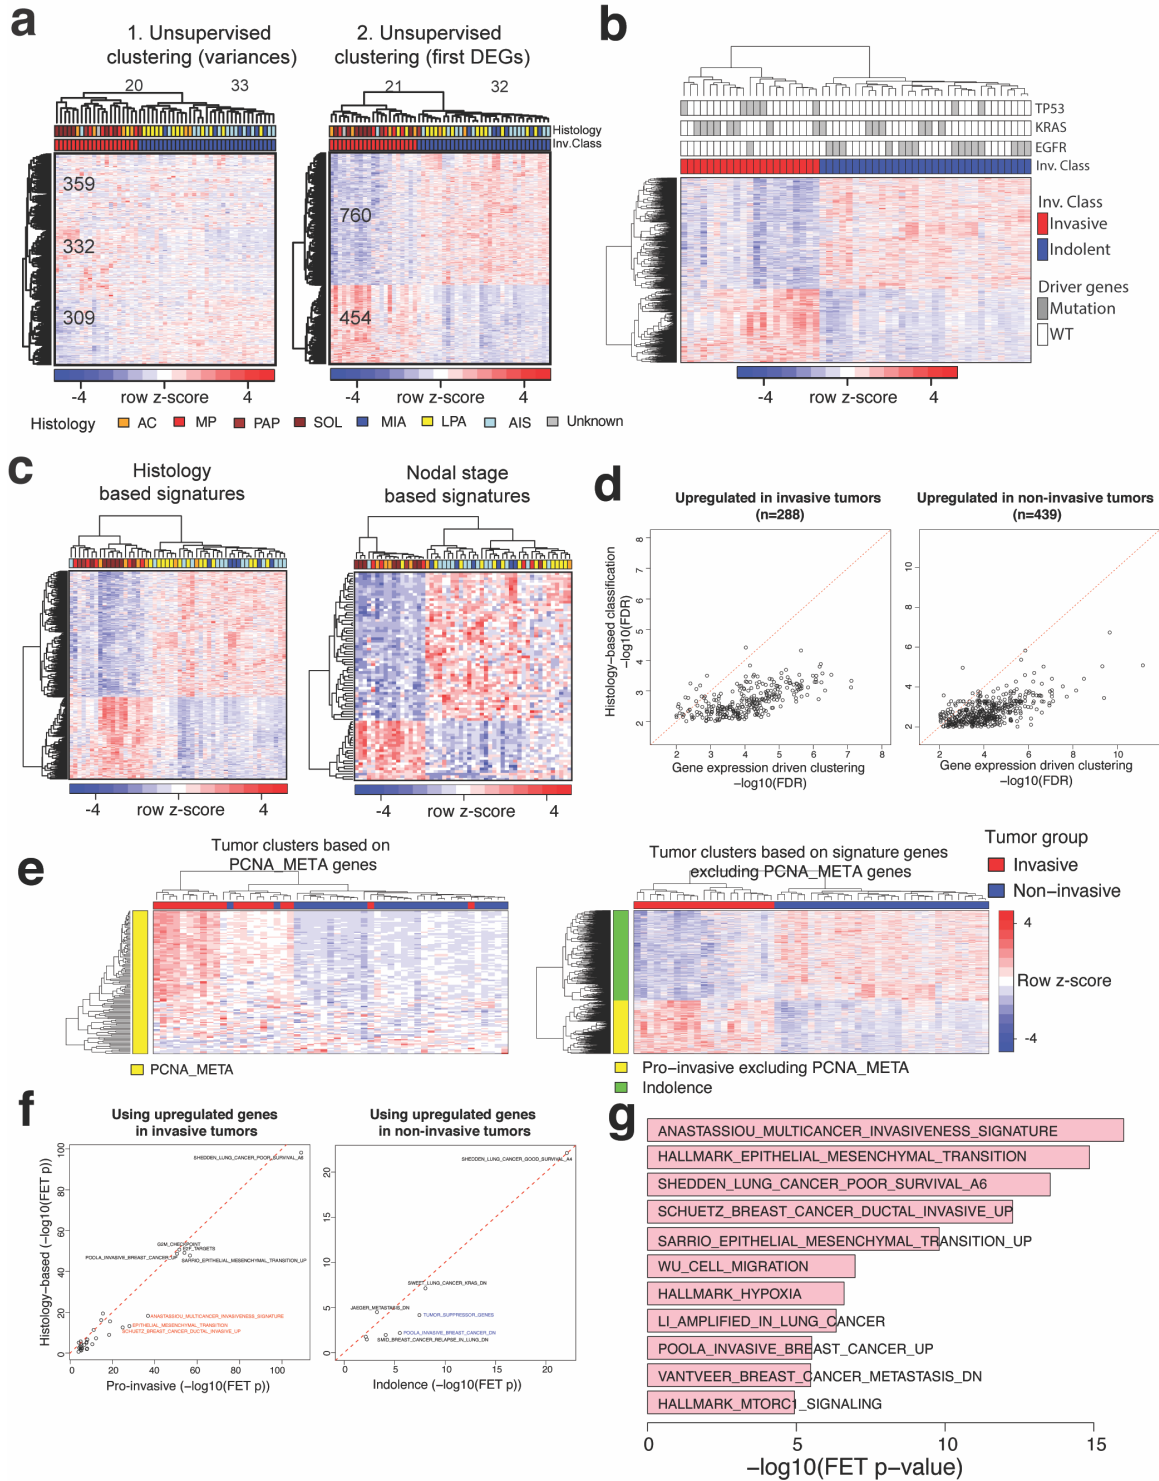

Supplementary Fig. 1. Identification of invasive signature genes.



- a.** Unsupervised clustering of 53 early-stage lung adenocarcinoma using top 1000 most varying genes (left) and another unsupervised clustering of the tumors using the DEGs between two groups separated by the most varying genes (right). Source data are provided in Source Data files.
- b.** Mutational landscape of 3 lung cancer driver genes (EGFR, KRAS, and TP53) among 53 early-stage lung adenocarcinoma. Source data are provided in Source Data files.
- c.** Differentially expressed genes based on histology (left) or nodal stage (right) of 53 early-stage lung adenocarcinoma. DEGs were determined using the same cutoffs ( $FC > 1.5$  &  $FDR < 0.01$ ). There were 313 genes up-regulated in tumors with aggressive histology (AC, MP, PAP, and SOL) compared to AIS/MIA/LPA tumors and 480 genes down-regulated in aggressive tumors. For node stage based DEGs, twenty-three genes were up-regulated and 57 genes were down-regulated in node positive tumors compared to no nodal metastasis tumors. Color code for the histology of each patient is same as in panel a. Source data are provided in Source Data files.
- d.** Gene expression differences of 727 common genes identified both from gene expression driven unsupervised clustering and histology-based clustering. Left: 288 common genes from pro-invasive and upregulated in histologically invasive tumors. Right: 439 common genes from indolence signature genes and upregulated genes in histologically non-invasive tumors. T-test FDRs of these genes between invasive and non-invasive tumors from the two approaches were compared. The detail statistics included in Supplementary Data 1.
- e.** Tumor clusters determined by meta-PCNA genes (left) and our signature genes excluding meta-PCNA genes. Source data are provided in Source Data files.
- f.** Functional enrichment analysis in MSigDB gene sets using signatures identified by unsupervised clustering using gene expression profiles and histology-based classification. Left: Genes upregulated in invasive tumors. Right: Genes upregulated in non-invasive

tumors. Fisher's exact test FDRs against the gene sets were compared between pro-invasive/indolence signature genes and histology based DEGs. Source data are provided in Source Data files.

- g.** Enriched gene sets within the unique in pro-invasive signature genes but not in histology based DEGs. One-sided FET p-values without multiple correction were log10 transformed. Source data are provided in Source Data files.

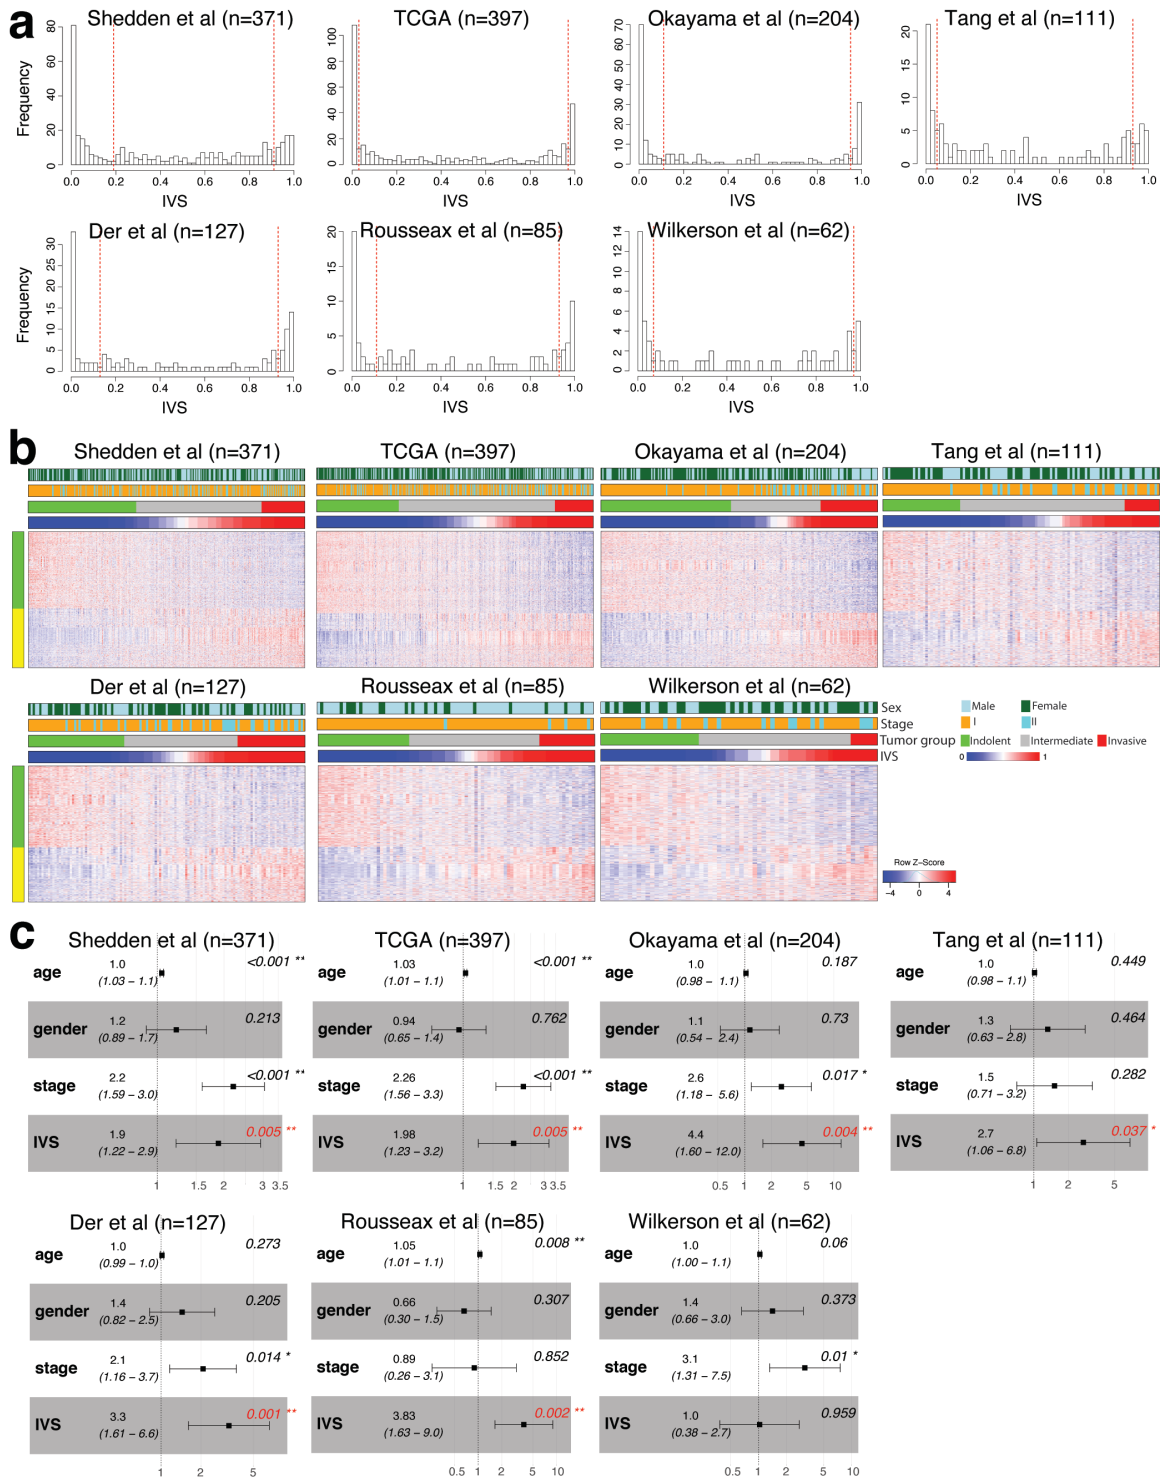

Supplementary Fig. 2. Invasiveness Score (IVS) associated with patient's survival

- a. Distribution of IVS in 7 independent lung cancer cohorts (stage I and II only). Tumors were further clustered into high, middle, and low IVS groups based on local minima of IVS based on the histogram (bin size=0.025). Source data are provided in Source Data files.
- b. Heatmap of expression of the signature genes of tumors in 7 cohorts. Samples were sorted from lowest IVS (left) to highest IVS (right).
- c. Forest-plots showing significant association of IVS with patients' survival in multiple lung cancer cohorts. Hazard ratios with 95% confidence intervals IVS were measured with age, sex, and stage as covariates. Center dots indicate Hazard ratios and error bars indicate upper and lower 95% confidence intervals. Significant associations (unadjusted two-sided test  $p < 0.05$ ) are shown in red.

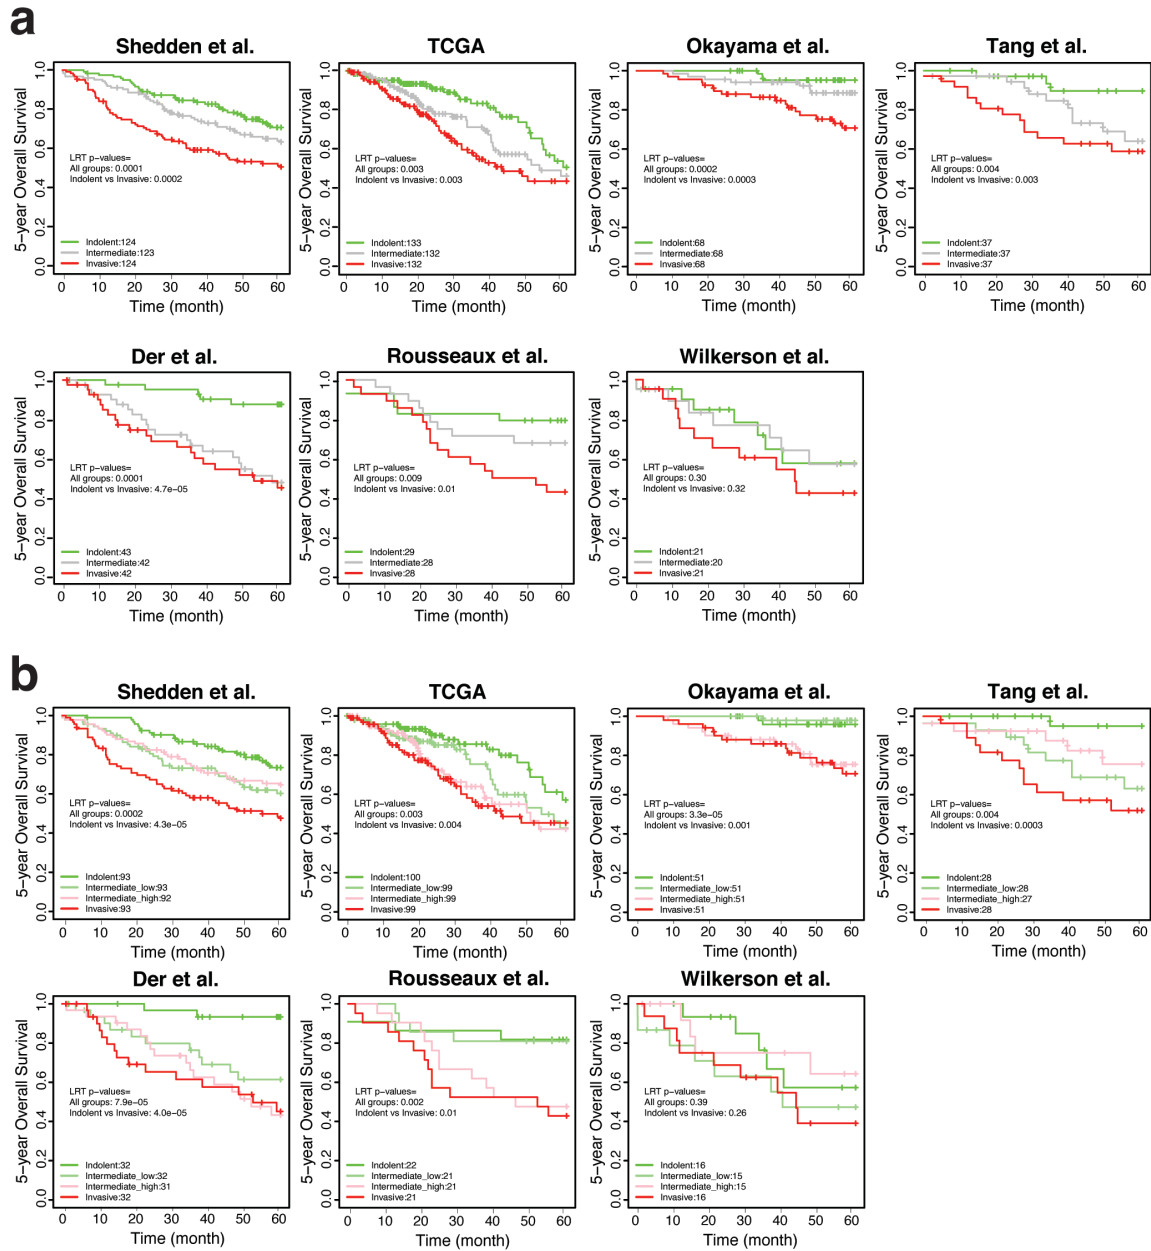

**Supplementary Fig 3.** Survival differences among patients grouped by IVS.

- a. The number of patients were evenly distributed into 3 groups. The indolent group with the lowest IVS is marked in red and the invasive group with the highest IVS is shown in green. Source data are provided in Source Data files.
- b. The number of patients were evenly distributed into 4 groups.

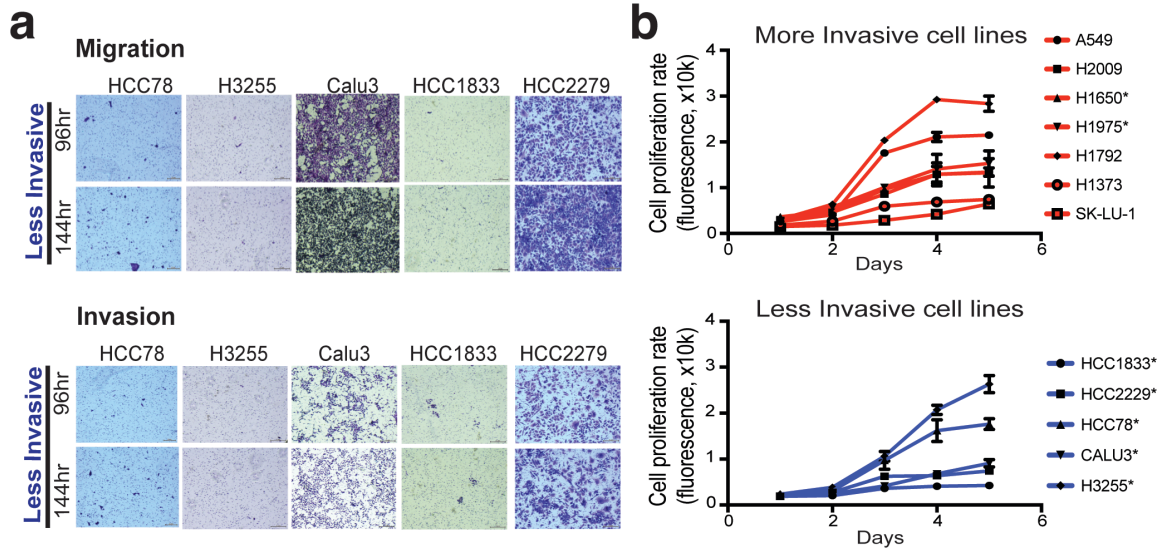

**Supplementary Fig. 4. Migration, invasion, and proliferation assay LUAD cells.**

- a. Representative images of migrated and invaded cells in transwell migration and transwell matrigel invasion assay after 96hr and 144hr in 5 less invasive LUAD cells. Scale bar 10 $\mu$ m.
- b. Cell proliferation rate for 7 more invasive LUAD cell lines (top) and 5 less invasive cell lines (bottom) from day1 to day5 using alamar blue assay. KRAS wild type cells are marked with \*. n=3. Data presented as mean  $\pm$  s.e.m. Data points were connected through connecting lines. Source data are provided in Source Data files.

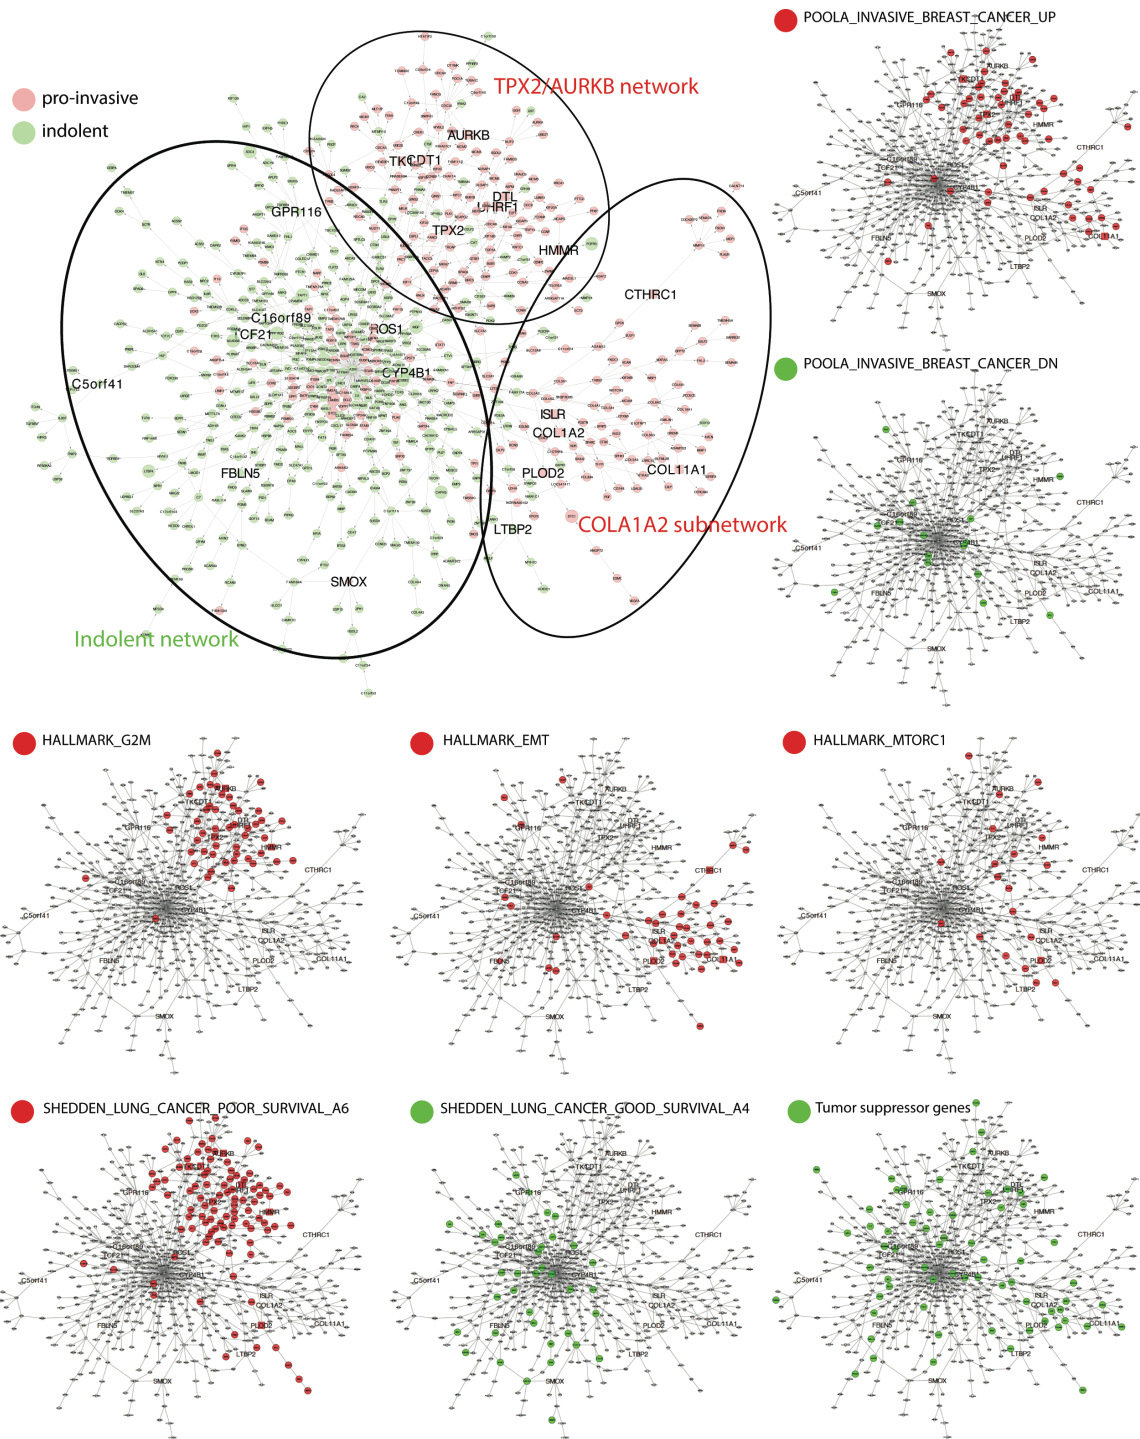

**Supplementary Fig. 5. Integrative regulatory network for early-stage lung adenocarcinoma constructed using TCGA LUAD stage I tumors.**

Subnetwork focusing on pro-invasive and indolent signature genes. Nodes are colored for the pro-invasive (red) and indolent (green) signature genes on the top-left corner. Genes from the selected



gene sets from Figure 1d are projected on the network and colored according to their association with the tumor invasion. Source data are provided in Source Data files.

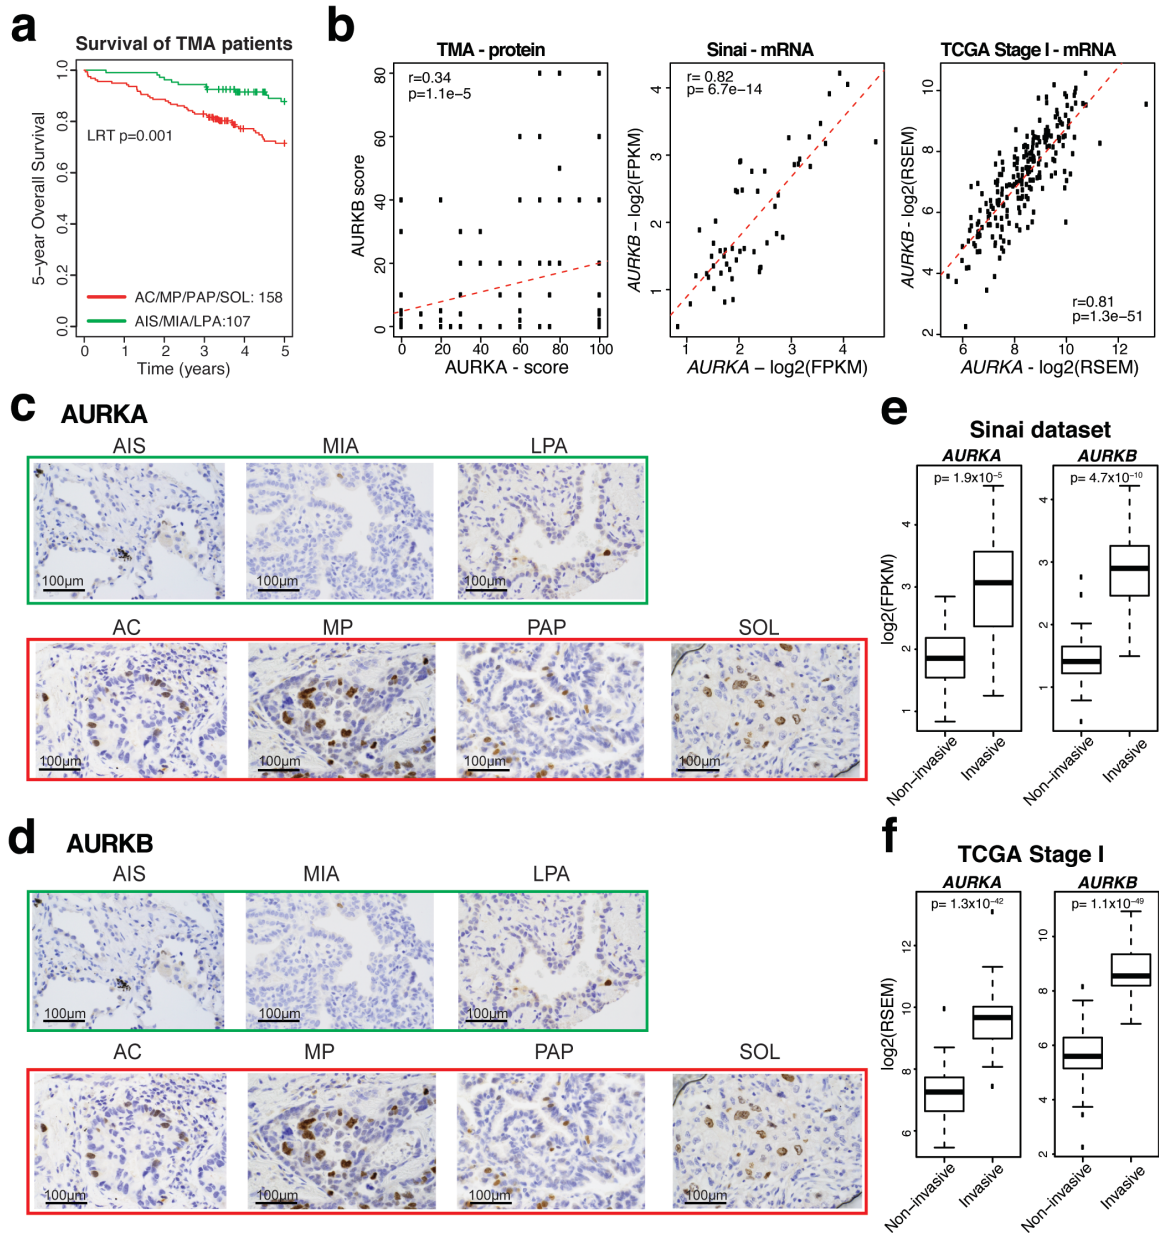

**Supplementary Fig. 6. AurA and AurB expression between invasive and non-invasive tumors**

**A.** Survival difference between invasive and non-invasive tumors in stage I TMA data. LRT p-value was measured. Source data are provided in Source Data files.

- B.** AurA and AurB protein expression from stage I tumor in the TMA dataset (left), mRNA expression across 53 samples from our original dataset (Sinai) (middle), and mRNA expression across 216 TCGA Stage 1 RNAseq samples (right). Pearson correlation coefficient and two-sided test p-values were estimated. Source data are provided in Source Data files.
- C.** Representative images from immunohistochemical staining of AurA in AIS, MIA, LPA vs AC, MP, PAP and SOL in human TMA. Scale bar 100 $\mu$ m.
- D.** Representative images from immunohistochemical staining of AurB in AIS, MIA, LPA vs AC, MP, PAP and SOL in human TMA. Scale bar 100 $\mu$ m.
- E.** Comparison of mRNA levels of *AURKA* and *AURKB* between invasive (n=21) and non-invasive (n=32) tumors from the Sinai dataset. The middle line of the box is median values for each group and the box edges are the 25<sup>th</sup> and 75<sup>th</sup> percentiles. Whiskers indicate maximum and minimum values of each group except for outliers. Two-side t-test p-value was measured.
- F.** Comparison of mRNA levels of *AURKA* and *AURKB* between invasive (n=55) and non-invasive (n=118) tumors from the TCGA Stage I samples. The middle line of the box is median values for each group and the box edges are the 25<sup>th</sup> and 75<sup>th</sup> percentiles. Whiskers indicate maximum and minimum values of each group except for outliers. Two-side t-test p-value was measured.

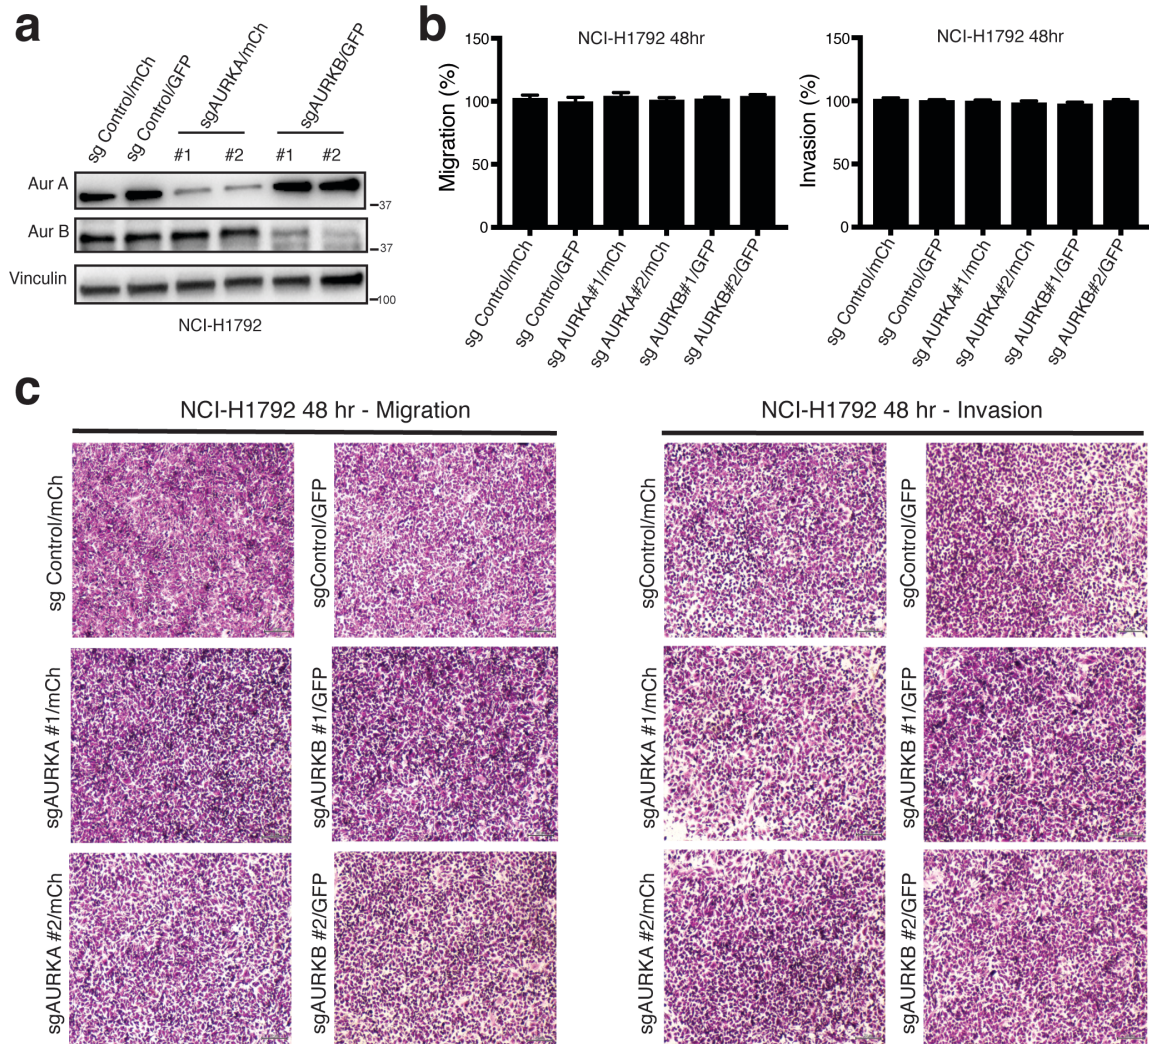

**Supplementary Fig. 7. CRISPR deletion of aurora kinase A or -B alone has no effect on migration and invasion in LUAD cells.**

- a. Western blot for H1792 cells transduced with indicated sgRNAs.
- b. Quantitation of percent migration and invasion of H1792 cells transduced with indicated sgRNAs at 48hr. Data presented as mean  $\pm$  s.e.m. No significant difference was observed for migration and invasion assay for all comparisons (n=4). Source data are provided in Source Data files.
- c. Representative images of migrated and invaded cells in transwell assay for H1792 transduced with indicated sgRNAs. Scale bar 10 $\mu$ m.



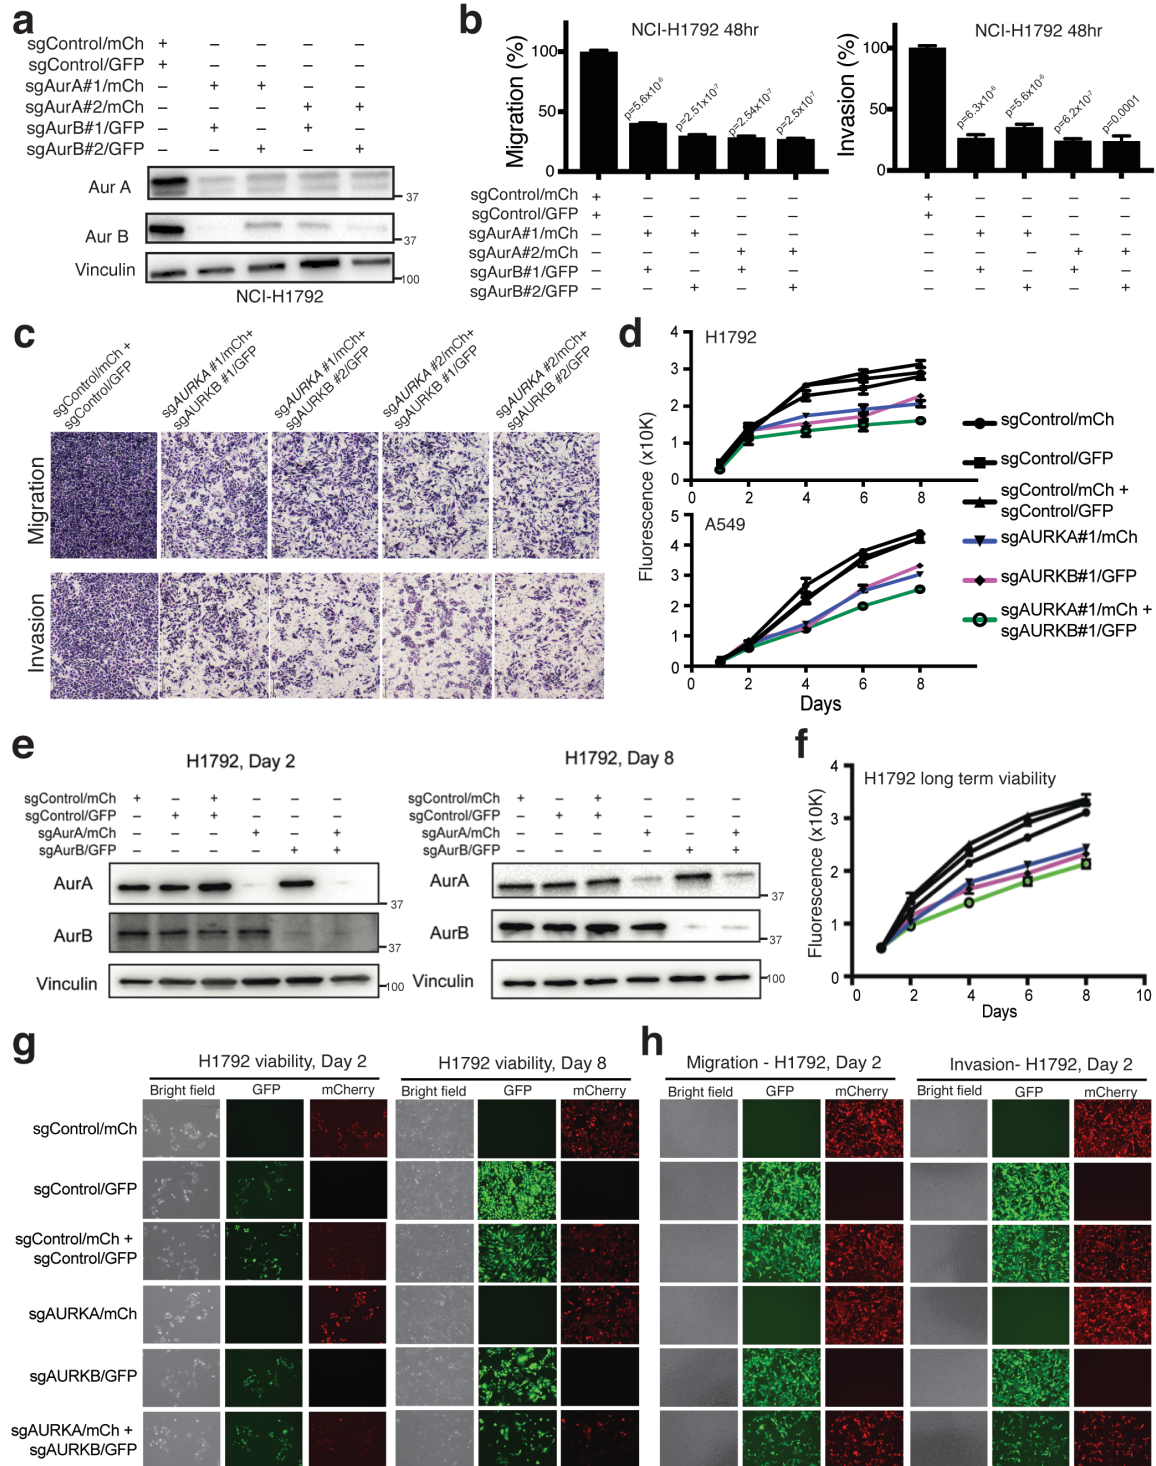

**Supplementary Fig. 8. CRISPR deletion of both aurora kinase A and B suppress migration and invasion in LUAD cells.**

**a.** Western blot for H1792 cells transduced with indicated sgRNAs.

- b.** Quantitation of percent migration and invasion of H1792 cells transduced with indicated sgRNAs at 48hr. Data presented as mean  $\pm$  s.e.m. Two-side t-test p-values with respect to control are provided (n=4). Source data are provided in Source Data files.
- c.** Representative images of migrated and invaded cells in transwell assay for H1792 transduced with indicated sgRNAs at 48hr. Scale bar 10 $\mu$ m.
- d.** Cell Proliferation shown as fluorescence measured by alamar blue assay (normalized to Day 1) showing effect of indicated sgRNA in (left) H1792 and (right) A549 cells from day 1 to Day 8. n=3. Data presented as mean  $\pm$  s.e.m. Data points were connected through connecting lines. Source data are provided in Source Data files.
- e.** Western blot for H1792 cells transduced with indicated sgRNAs at day 2 and day8.
- f.** Cell Proliferation shown as fluorescence measured by alamar blue assay (normalized to Day 1) showing effect of indicated sgRNA in H1792 cells from day 1 to Day 8. n=3. Colors of each condition is same as in panel d. Source data are provided in Source Data files.
- g.** Bright field and fluorescence images to visualize viability of cells transduced with indicated sgRNAs at Day 2 and day 8.
- h.** Bright field and fluorescence images for migration and invasion of cells transduced with indicated sgRNAs at Day2.

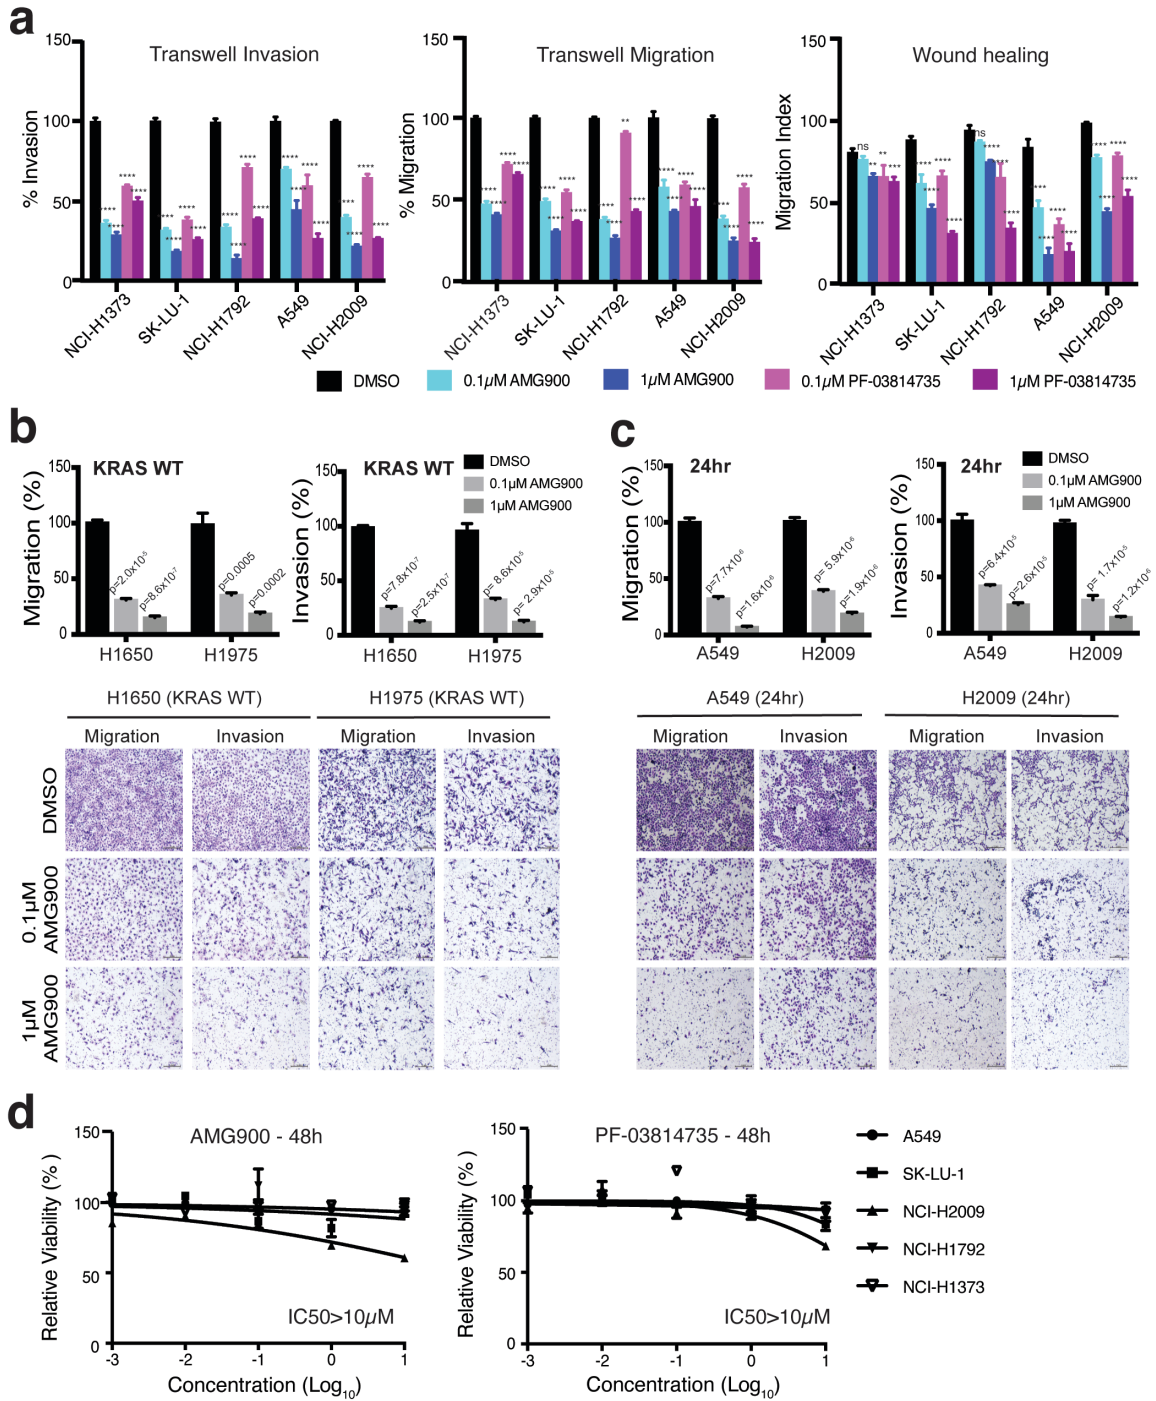

**Supplementary Fig. 9. Pan aurora kinase inhibitors suppress migration and invasion in panel of invasive LUAD cells via suppressing aurora kinases activity.**

- a.** Quantification of %Migration, %Invasion from transwell migration and invasion assays respectively, and migration index from wound healing assay, for panel of 5 invasive LUAD

- cells treated with DMSO, AMG900 (0.1 $\mu$ M, 1 $\mu$ M) and PF-03814735 (0.1 $\mu$ M, 1 $\mu$ M). For migration and invasion assay, n=8 for DMSO and n=4 for AMG900 (0.1 $\mu$ M, 1 $\mu$ M) and PF-03814735 (0.1 $\mu$ M, 1 $\mu$ M). For wound healing assay n=16 for DMSO and n=8 for AMG900 (0.1 $\mu$ M, 1 $\mu$ M) and PF-03814735 (0.1 $\mu$ M, 1 $\mu$ M). Data presented as mean  $\pm$  s.e.m. Significant comparison from two-side t-test is marked with asterisk. Exact p-value for each test is provided in Supplementary Table 7. Source data are provided in Source Data files.
- b.** Quantification (top) of %Migration and %Invasion from transwell migration and invasion assays in 2 KRAS wild type highly invasive cell lines H1650 and H1975 treated with DMSO and AMG900 (0.1 $\mu$ M, 1 $\mu$ M). Representative images are shown at bottom, Scale bar 10 $\mu$ m. Data presented as mean  $\pm$  s.e.m. Two-side t-test p-values are provided (n=3). Source data are provided in Source Data files.
  - c.** Quantification (top) of %Migration and %Invasion from transwell migration and invasion assays in 2 highly invasive cell lines A549 and H2009 treated with DMSO and AMG900 (0.1 $\mu$ M, 1 $\mu$ M) measured at 24hr (timeframe shorter than their doubling time). Representative images are shown at bottom, Scale bar 10 $\mu$ m. Data presented as mean  $\pm$  s.e.m. Two-side t-test p-values are provided (n=3). Source data are provided in Source Data files.
  - d.** Relative viability of panel of 5 invasive LUAD cells treated with DMSO vs serial dilution of AMG900 or PF-03814735 for 48hr. log(inhibitor) vs. normalized response -- Variable slope, n=3, Data presented as mean  $\pm$ s.e.m. Source data are provided in Source Data files.



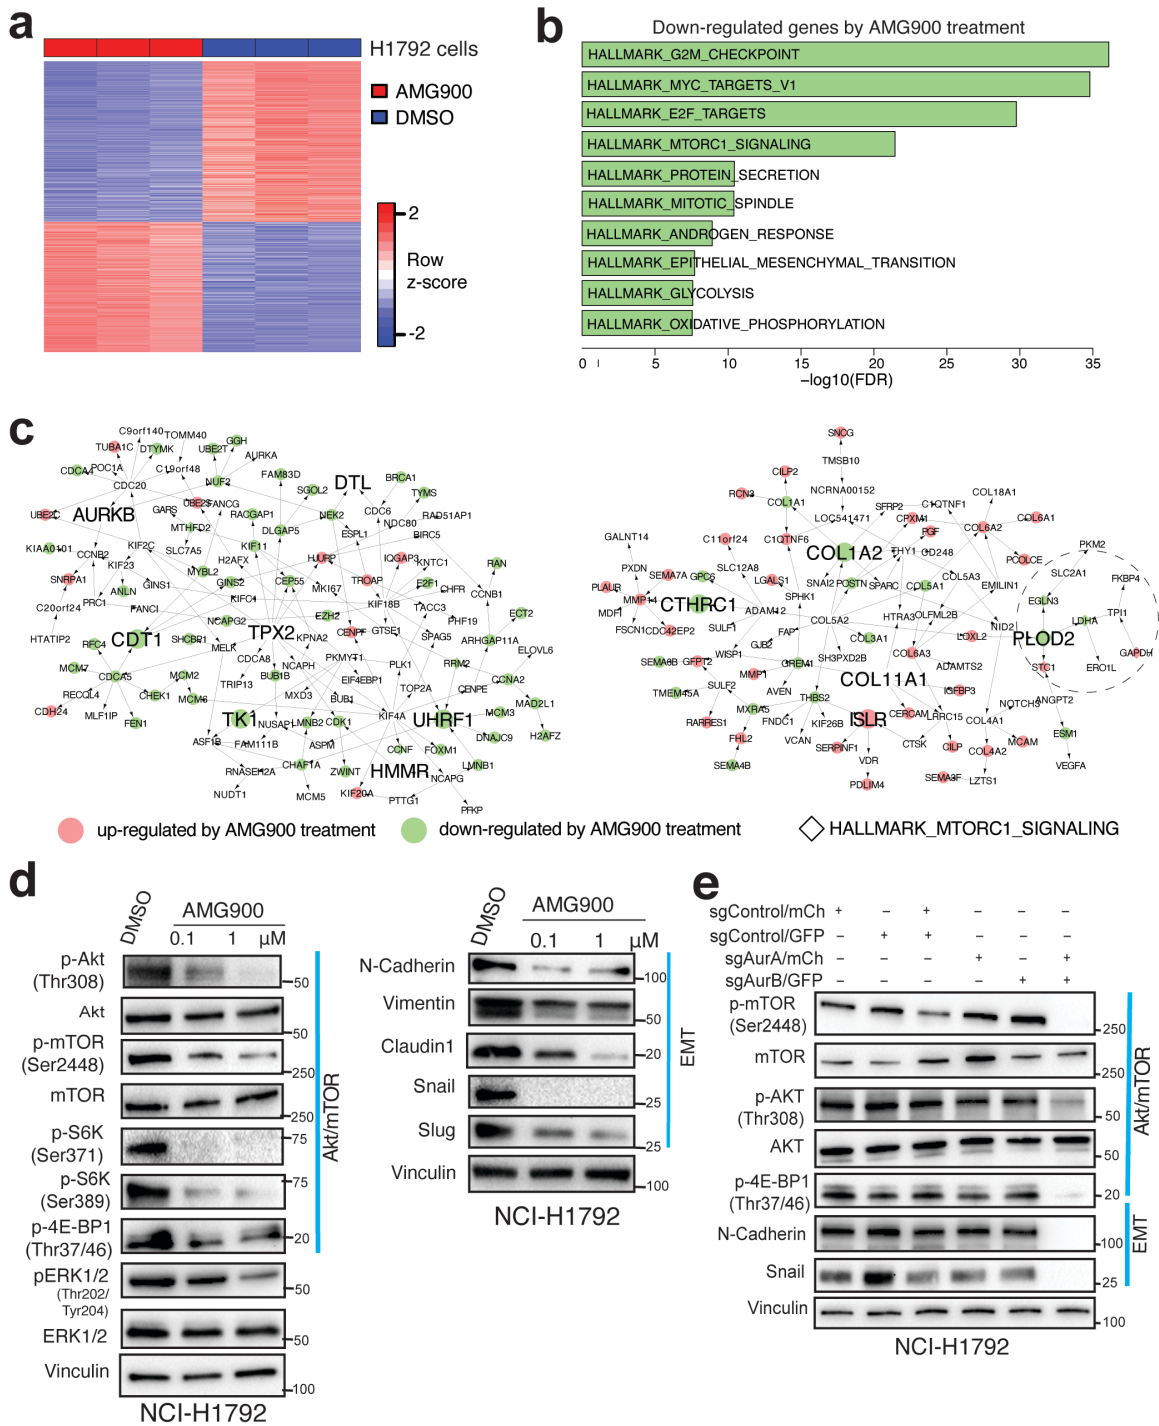

**Supplementary Fig. 10. Aurora kinases drive invasiveness in lung adenocarcinoma through activating AKT/mTOR and EMT pathways**

**a.** Differentially expressed genes between DMSO and 0.1  $\mu\text{M}$  AMG900 treated H1792 cells.

**b.** Top 10 down-regulated hallmark pathways by AMG900 treatment.

- c.** Overlaying the DEGs onto the TPX2/AURKB and COL1A2 subnetworks. Nodes filled in red are up-regulated and ones in green are down-regulated by AMG900 treatment. Genes included in HALLMARK\_MTORC1\_SIGLANING pathways are indicated with diamond shapes (◊).
- d.** Western blot for indicated proteins in H1792 cells treated with DMSO and indicated concentrations of AMG900 for 48hr.
- e.** Western blot for H1792 cells treated with indicated sgRNAs for AKT/mTOR and EMT pathway.

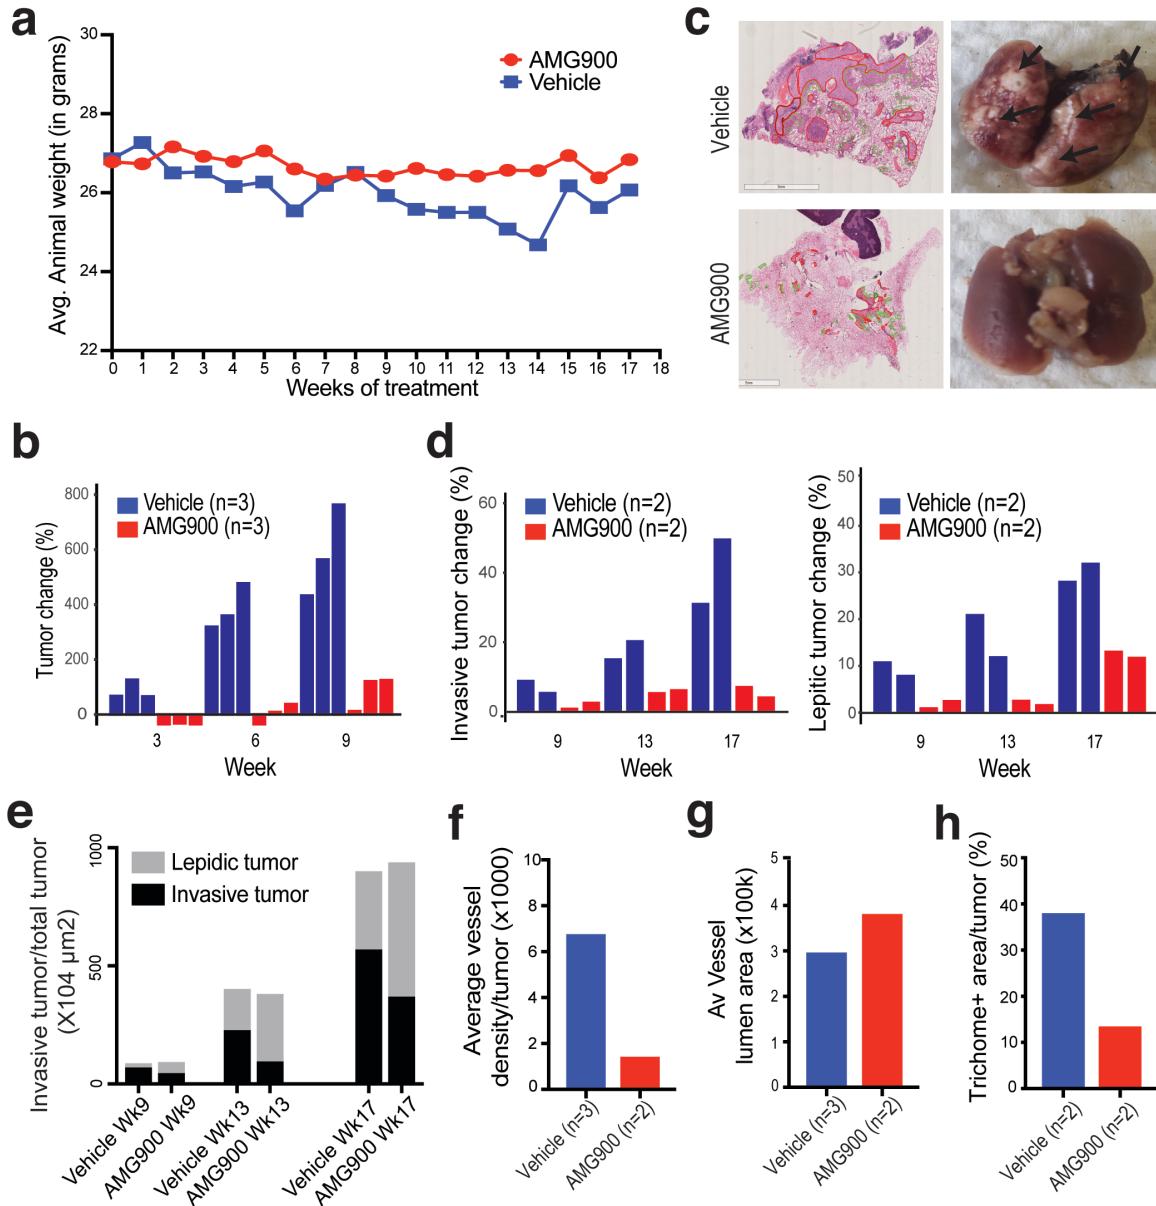

**Supplementary Fig. 11. Aurora kinase inhibition suppresses progression of invasive LUAD in *Kras(G12D)/TGFBFR2<sup>-/-</sup>* mouse model**

- a. Average animal weight for vehicle and AMG900 treated animals after treatment starting till week 17. Drop in animal weight in vehicle group reflects loss in body weight of sick animal, which died at that time point. Vehicle n=8, AMG900 n=10. Source data are provided in Source Data files.

- b. Waterfall plot showing percent change in tumor burden from micro-CT data for vehicle and AMG900 treated animals. (n=3). Source data are provided in Source Data files.
- c. (left) Representative images showing annotated invasive and lepidic tumor areas in vehicle (Scale bar 3mm) and AMG900 (Scale bar 5mm) treated animal's lung. (right) photographs of dissected lungs from vehicle and AMG900 treated animals. Several tumor nodules (arrows) are seen by naked eye in vehicle treated animal lung.
- d. Waterfall plot showing percent change in invasive and lepidic tumor areas from histopathological analysis for vehicle and AMG900 treated animals. (n=2)
- e. Stacked plot showing invasive tumor lesion area per total tumor area in vehicle and AMG900 treated animals with equal overall tumor burden at week 9, 13 and 17. (n=2). Source data are provided in Source Data files.
- f. Average vessel density from CD31 IHC staining for tumor infiltrating neovessels in in vehicle and AMG900 treated animal's lung. (vehicle n=3, AMG900 n=2) Source data are provided in Source Data files.
- g. Average vessel lumen area quantified from CD31 IHC staining in vehicle and AMG900 treated animal's lung. Most vessels in the vehicle group tumor appeared collapsed while in AMG900 treated mouse tumor vessels were wider, however the difference wasn't significant between both groups. (vehicle n=3, AMG900 n=2) Source data are provided in Source Data files.
- h. Quantification of collagen deposition from Masson's trichome staining in vehicle and AMG900 treated animal's lung. (n=2) Source data are provided in Source Data files.

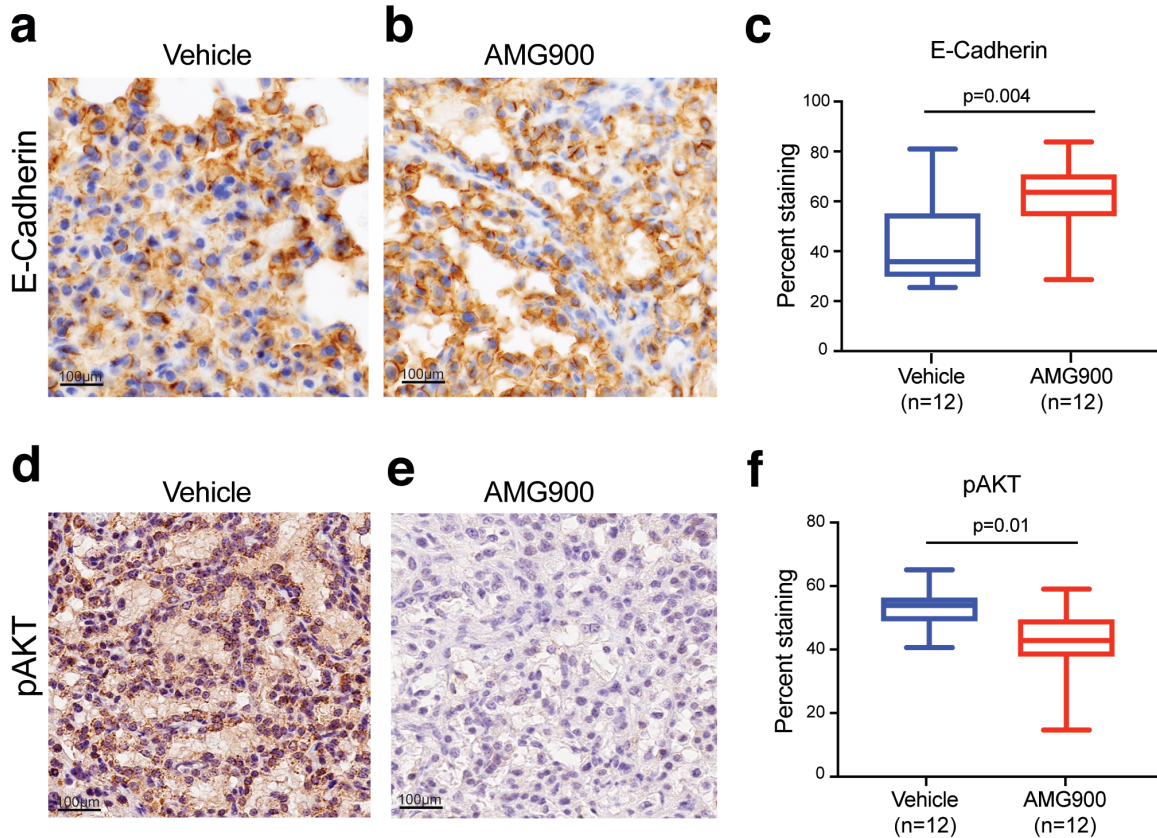

**Supplementary Fig. 12. Aurora kinase inhibition leads to upregulation in EMT marker E-Cadherin and suppression of pAKT in *Kras(G12D)/TGFBR2<sup>-/-</sup>* mouse model**

(a-b) E-Cadherin immunostaining showing reduction in staining intensity in transition to invasive growth pattern in (a) vehicle controls when compared to uniform strong membranous staining in (b) AMG900 treated mice. Scale bar 100 $\mu$ m.

(c) Box plot shows values of twelve regions of interest for E-Cadherin staining analyzed by Image J plugin IHC profiler. Center line represents the median value (50th percentile), while the box contains the 25th to 75th percentiles of dataset. The whiskers mark the minimum and maximum values. Two-side t-test p=0.004 without multiple correction, n=12 (4 regions analyzed from 3 mice). Source data are provided in Source Data files.

(d-e) Immunohistochemistry for pAKT showing strong staining in tumors cells in (d) vehicle animals while significantly low staining in (e) AMG900 treated mice. Scale bar 100 $\mu$ m.

(f) Box plot shows values of twelve regions of interest for pAKT staining analyzed by Image J plugin IHC profiler. Center line represents the median value (50th percentile), while the box contains the 25th to 75th percentiles of dataset. The whiskers mark the minimum and maximum values, respectively. Two-side t-test  $p=0.01$  without multiple correction,  $n=12$  (4 regions analyzed from 3 mice). Source data are provided in Source Data files. (a, b, d, e, Original magnification x150).

## Supplementary Tables

**STable 1. Clinical information of 53 early-stage lung adenocarcinoma**

| CaseID  | PRED.HISTO | T.STAGE | N.STAGE | Subgroup     |
|---------|------------|---------|---------|--------------|
| NIHAD1  | MP         | T1A     | N1      | Invasive     |
| NIHAD10 | MP         | T1A     | N1      | Invasive     |
| NIHAD11 | AC         | T1A     | N0      | Non-invasive |
| NIHAD14 | MP         | T1A     | N0      | Invasive     |
| NIHAD15 | MP         | T1A     | N0      | Invasive     |
| NIHAD18 | SOL        | T1A     | N0      | Invasive     |
| NIHAD20 | SOL        | T1A     | N0      | Invasive     |
| NIHAD21 | LPA        | T1A     | N0      | Non-invasive |
| NIHAD25 | LPA        | T1A     | N0      | Non-invasive |
| NIHAD28 | LPA        | T1A     | N0      | Non-invasive |
| NIHAD29 | LPA        | T2A     | N0      | Non-invasive |
| NIHAD30 | LPA        | T1A     | N0      | Non-invasive |
| NIHAD31 | MIA        | T1A     | N0      | Non-invasive |
| NIHAD32 | LPA        | T1B     | N0      | Non-invasive |
| NIHAD35 | MIA        | T1A     | NX      | Non-invasive |
| NIHAD36 | AIS        | T1A     | N0      | Non-invasive |
| NIHAD37 | AIS        | T1A     | N0      | Non-invasive |
| NIHAD38 | AIS        | T1A     | N0      | Non-invasive |
| NIHAD4  | SOL        | T1A     | N1      | Invasive     |
| NIHAD40 | AIS        | T1A     | N0      | Non-invasive |
| NIHAD44 | AIS        | T1B     | N0      | Non-invasive |
| NIHAD45 | MIA        | T1A     | N0      | Non-invasive |
| NIHAD47 | MIA        | T1A     | N0      | Non-invasive |
| NIHAD48 | AIS        | T1A     | N0      | Non-invasive |
| NIHAD49 | MIA        | T1A     | N0      | Non-invasive |
| NIHAD50 | MIA        | T2A     | N0      | Non-invasive |
| NIHAD51 | MP         | T1B     | N0      | Invasive     |
| NIHAD52 | SOL        | T1A     | N0      | Invasive     |
| NIHAD53 | AC         | T1A     | N0      | Non-invasive |
| NIHAD58 | AC         | T1B     | N0      | Invasive     |
| NIHAD61 | AC         | T1B     | N2      | Invasive     |
| NIHAD62 | AC         | T1B     | N1      | Invasive     |
| NIHAD63 |            |         |         | Invasive     |
| NIHAD64 | PAP        | T1B     | N2      | Non-invasive |



|         |     |     |    |              |
|---------|-----|-----|----|--------------|
| NIHAD66 | SOL | T1B | N2 | Invasive     |
| NIHAD67 | AC  | T1B | N1 | Invasive     |
| NIHAD68 | PAP | T1B | N0 | Invasive     |
| NIHAD69 | LPA | T1B | N0 | Invasive     |
| NIHAD70 | LPA | T2A | N0 | Non-invasive |
| NIHAD71 | LPA | T1B | N0 | Non-invasive |
| NIHAD73 | LPA | T1A | N0 | Non-invasive |
| NIHAD74 | LPA | T2A | N0 | Non-invasive |
| NIHAD75 | LPA | T1A | N0 | Non-invasive |
| NIHAD77 | LPA | T1B | N0 | Invasive     |
| NIHAD8  | SOL | T1A | N1 | Invasive     |
| NIHAD80 | AIS | T1A | N0 | Non-invasive |
| NIHAD81 | AIS | T1B | N0 | Invasive     |
| NIHAD82 | AIS | T1A | N0 | Non-invasive |
| NIHAD83 | AIS | T1B | N0 | Non-invasive |
| NIHAD85 | AIS | T2A | N0 | Non-invasive |
| NIHAD87 | AIS | T1A | N0 | Non-invasive |
| NIHAD88 | AIS | T1A | N0 | Non-invasive |
| NIHAD9  | SOL | T1A | N1 | Invasive     |

**STable 2. Comparison of invasive signatures (pro-invasive and indolence signatures) with DEGs from mouse model**

|                      | Mouse model (Tgfr2 status)                                                                                                                                                                                                                                                    |                                                                                                                                                                             |
|----------------------|-------------------------------------------------------------------------------------------------------------------------------------------------------------------------------------------------------------------------------------------------------------------------------|-----------------------------------------------------------------------------------------------------------------------------------------------------------------------------|
|                      | Upregulated in Tgfr2 -/- (n=364)                                                                                                                                                                                                                                              | Upregulated in Tgfr2 WT (n=316)                                                                                                                                             |
| Pro-invasive (n=456) | <i>1810055G02Rik, Aldoa, Angpt14, Cd248, Cda, Col5a2, Col7a1, Fam20c, Fhl2, Gjb3, Gpc1, Gpc6, Gtse1, Htra3, Igfbp3, Kpna2, Mmp11, Mmp14, Mt2, Nid2, Olfml2b, Plek2, Psrc1, S100a16, Sdcbp2, Slc6a8, Spp1, SrpX2, Thbs2, Timp1, Tpi1, Uck2, Wisp1</i> (33, OR=4.97, p=1.6e-12) | <i>Ido1, Tap2</i> (2, OR=0.30, p=0.99)                                                                                                                                      |
| Indolence (n=683)    | <i>AA986860, Aqp5, Bcam, Cldn18, Clic5, Epb4.114a, EphA3, Ephx2, Fam189a2, Flrt3, Gdf15, Icam4, Itga9, Kcnk5, Megf11, Ndnf, Pard6b, Prg4, Prss16, Pvr13, Scara3, Tgfb2, Tmem98, Zfp458</i> (24, OR=2.23, p=0.0005)                                                            | <i>Aff3, Angpt1, Ankrd29, Bmp5, Camk1d, Cass4, Cd207, Cldn1, Esyt3, Fmo2, Fmo5, Hlf, Limd1, Lztfl1, Mamdc2, Per3, Scube2, Slc46a3, Tppp, Zfp874a</i> (20, OR=2.12, p=0.002) |

**STable 3. Comparison of survival association of tumor groups classified with different IVS brackets**

| Invasive vs Indolent    | Local_minima                |             | Fixed IVS value cutoff |             |                       |             |                       |             |
|-------------------------|-----------------------------|-------------|------------------------|-------------|-----------------------|-------------|-----------------------|-------------|
|                         | HR(95% CI)                  | LRT p-value | IVS>0.95 vs IVS<0.05   |             | IVS>0.9 vs IVS<0.1    |             | IVS>0.8 vs IVS<0.2    |             |
|                         |                             |             | HR(95% CI)             | LRT p-value | HR(95% CI)            | LRT p-value | HR(95% CI)            | LRT p-value |
| Shedden et al. (n=371)  | 2.62(1.65-4.17)             | 8.30E-05    | 3.99(2.27-7.00)        | 3.70E-06    | 3.01(1.85-4.88)       | 1.30E-05    | 2.12(1.39-3.24)       | 5.00E-04    |
| TCGA (n=397)            | 2.37(1.34-4.19)             | 0.004       | 2.07(1.20-3.57)        | 0.009       | 2.24(1.38-3.64)       | 0.001       | 1.63(1.05-2.52)       | 0.03        |
| Okayama et al. (n=204)  | 9.01(2.48-32.79)            | 0.0002      | 7.82(2.15-28.43)       | 0.0005      | 9.86(2.81-34.61)      | 2.80E-05    | 8.69(2.86-26.42)      | 1.68E-05    |
| Tang et al. (n=111)     | 7.31(1.47-36.25)            | 0.007       | 5.81(1.06-31.75)       | 0.04        | 7.56(2.08-27.50)      | 0.0006      | 3.19(1.26-8.11)       | 0.01        |
| Der et al. (n=127)      | 5.82(2.09-16.22)            | 0.0003      | 13.92(3.10-62.49)      | 1.70E-05    | 6.23(2.30-16.84)      | 5.00E-05    | 5.09(2.15-12.01)      | 4.94E-05    |
| Rousseaux et al. (n=85) | 3.17(1.15-8.76)             | 0.02        | 5.13(1.60-16.49)       | 0.003       | 3.21(1.21-8.47)       | 0.01        | 3.51(1.45-8.50)       | 0.003       |
| Wilkerson et al. (n=62) | 3.30(1.07-10.20)            | 0.05        | 1.34(0.56-3.20)        | 0.52        | 1.37(0.61-3.07)       | 0.45        | 1.11(0.54-2.26)       | 0.79        |
| Invasive vs Indolent    | Fixed IVS percentile cutoff |             |                        |             |                       |             |                       |             |
|                         | Top 5% vs Bottom 5%         |             | Top 10% vs Bottom 10%  |             | Top 20% vs Bottom 20% |             | Top 30% vs Bottom 30% |             |
|                         | HR(95% CI)                  | LRT p-value | HR(95% CI)             | LRT p-value | HR(95% CI)            | LRT p-value | HR(95% CI)            | LRT p-value |
| Shedden et al. (n=371)  | 3.76(0.99-14.19)            | 4.00E-02    | 5.24(2.23-12.32)       | 2.91E-05    | 3.24(1.81-5.80)       | 2.86E-05    | 2.52(1.58-4.04)       | 6.71E-05    |
| TCGA (n=397)            | 9.31(1.19-72.78)            | 0.005       | 2.70(1.12-6.51)        | 0.02        | 2.74(1.46-5.14)       | 1.00E-03    | 1.95(1.19-3.20)       | 0.007       |
| Okayama et al. (n=204)  | -                           | 0.09        | -                      | 0.01        | 6.02(1.32-27.53)      | 0.007       | 10.17(2.35-44.07)     | 5.25E-05    |
| Tang et al. (n=111)     | -                           | 0.01        | -                      | 0.007       | 12.78(1.65-99.10)     | 0.0008      | 7.42(1.67-32.89)      | 0.001       |
| Der et al. (n=127)      | 10.87(1.02-115.51)          | 0.03        | 12.69(1.49-107.72)     | 0.004       | 9.11(2.03-40.85)      | 0.0004      | 14.64(3.40-63.06)     | 1.01E-06    |
| Rousseaux et al. (n=85) | -                           | 0.03        | -                      | 0.01        | 6.12(1.34-28.07)      | 0.006       | 3.13(1.22-8.04)       | 0.01        |
| Wilkerson et al. (n=62) | 3.10(0.55-17.42)            | 0.18        | 1.07(0.51-2.25)        | 0.18        | 1.75(0.72-4.27)       | 0.21        | 1.07(0.51-2.25)       | 0.86        |

"-" : Hazard ratios are not converged mainly due to small number of samples

| Invasive vs Indolent    | Even number of samples in each group |             |                               |             |
|-------------------------|--------------------------------------|-------------|-------------------------------|-------------|
|                         | Top vs Bottom out of 4 groups        |             | Top vs Bottom out of 3 groups |             |
|                         | HR(95% CI)                           | LRT p-value | HR(95% CI)                    | LRT p-value |
| Shedden et al. (n=371)  | 2.82(1.68-4.74)                      | 4.30E-05    | 2.28(1.47-3.55)               | 0.0002      |
| TCGA (n=397)            | 2.26(1.28-4.00)                      | 0.004       | 2.05(1.27-3.31)               | 0.003       |
| Okayama et al. (n=204)  | 7.57(1.71-33.56)                     | 0.001       | 6.67(1.95-22.79)              | 0.0003      |
| Tang et al. (n=111)     | 14.09(1.83-108.43)                   | 0.0003      | 5.21(1.50-18.14)              | 0.003       |
| Der et al. (n=127)      | 11.12(2.54-48.80)                    | 4.00E-05    | 5.99(2.24-16.01)              | 4.70E-05    |
| Rousseaux et al. (n=85) | 3.74(1.20-11.65)                     | 0.01        | 3.19(1.24-8.18)               | 0.01        |
| Wilkerson et al. (n=62) | 1.86(0.62-5.55)                      | 0.26        | 1.61(0.62-4.16)               | 0.32        |

**STable 4. Key drivers for the signature genes**

| For pro-invasive signatures |        |         |       |          | For indolence signatures |        |         |       |          |
|-----------------------------|--------|---------|-------|----------|--------------------------|--------|---------|-------|----------|
| GeneName                    | Target | Overlap | OR    | p-value  | GeneName                 | Target | Overlap | OR    | p-value  |
| <b>TPX2</b>                 | 79     | 42      | 24.51 | 1.06E-34 | <b>C16orf89</b>          | 120    | 47      | 9.34  | 2.79E-24 |
| <b>COL1A2</b>               | 34     | 24      | 49.4  | 1.60E-24 | <b>GPR116</b>            | 32     | 22      | 30.64 | 7.36E-19 |
| <b>AURKB</b>                | 36     | 23      | 36.31 | 5.30E-22 | <b>TCF21</b>             | 34     | 21      | 22.45 | 1.30E-16 |
| <b>UHRF1</b>                | 34     | 22      | 37.53 | 2.83E-21 | <b>SMOX</b>              | 26     | 17      | 26.05 | 2.79E-14 |
| <b>CDT1</b>                 | 28     | 17      | 31.25 | 5.17E-16 | <b>ROS1</b>              | 32     | 18      | 17.75 | 2.04E-13 |
| <b>COL11A1</b>              | 18     | 14      | 70.15 | 9.60E-16 | <b>CYP4B1</b>            | 794    | 109     | 2.41  | 5.33E-13 |
| <b>CTHRC1</b>               | 23     | 13      | 25.99 | 5.76E-12 | <b>C5orf41</b>           | 26     | 14      | 16    | 2.29E-10 |
| <b>TK1</b>                  | 19     | 11      | 27.35 | 1.84E-10 | <b>FBLN5</b>             | 13     | 10      | 45.4  | 5.71E-10 |
| <b>ISLR</b>                 | 27     | 12      | 15.94 | 1.47E-09 | <b>LTBP2</b>             | 34     | 15      | 10.84 | 1.89E-09 |

|              |    |    |       |          |
|--------------|----|----|-------|----------|
| <i>ROR2</i>  | 22 | 11 | 19.89 | 1.50E-09 |
| <i>PLOD2</i> | 16 | 9  | 25.44 | 1.27E-08 |
| <i>HMMR</i>  | 12 | 8  | 39.48 | 1.31E-08 |
| <i>DTL</i>   | 13 | 8  | 31.58 | 3.25E-08 |

**STable 5. Gene set enriched within TPX2/AURKB and COL1A2 subnetworks**

***TPX2/AURKB subnetwork***

| Geneset                                     | Size | Overlap | OddRatio | p.value  |
|---------------------------------------------|------|---------|----------|----------|
| HALLMARK_G2M_CHECKPOINT                     | 131  | 49      | 66.93    | 1.45E-59 |
| HALLMARK_E2F_TARGETS                        | 146  | 49      | 56.50    | 8.71E-57 |
| HALLMARK_MITOTIC_SPINDLE                    | 159  | 25      | 15.74    | 1.50E-19 |
| HALLMARK_SPERMATOGENESIS                    | 43   | 10      | 22.42    | 3.44E-10 |
| HALLMARK_MYC_TARGETS_V1                     | 116  | 13      | 9.52     | 9.62E-09 |
| HALLMARK_MTORC1_SIGNALING                   | 159  | 10      | 4.90     | 9.37E-05 |
| SHEDDEN_LUNG_CANCER_POOR_SURVIVAL_A6        | 303  | 83      | 76.91    | 3.82E-94 |
| POOLA_INVASIVE_BREAST_CANCER_UP             | 218  | 36      | 18.68    | 5.73E-29 |
| PUIFFE_INVASION_INHIBITED_BY_ASCITES_UP     | 57   | 8       | 11.85    | 1.36E-06 |
| WINNEPENINCKX_MELANOMA_METASTASIS_UP        | 112  | 46      | 75.25    | 5.09E-58 |
| BIDUS_METASTASIS_UP                         | 127  | 28      | 24.70    | 3.76E-26 |
| SUNG_METASTASIS_STROMA_DN                   | 36   | 9       | 24.47    | 1.36E-09 |
| JAEGER_METASTASIS_UP                        | 31   | 8       | 25.32    | 8.86E-09 |
| WANG_METASTASIS_OF_BREAST_CANCER_ESR1_UP    | 16   | 6       | 42.95    | 5.65E-08 |
| LIAO_METASTASIS                             | 389  | 18      | 3.71     | 1.04E-05 |
| SARRIO_EPITHELIAL_MESENCHYMAL_TRANSITION_UP | 135  | 45      | 53.12    | 1.02E-51 |

***COL1A2 subnetwork***

| Geneset                                        | Size | Overlap | OddRatio | p.value     |
|------------------------------------------------|------|---------|----------|-------------|
| HALLMARK_EPITHELIAL_MESENCHYMAL_TRANSITION     | 168  | 34      | 33.36    | 1.85E-34    |
| HALLMARK_GLYCOLYSIS                            | 156  | 12      | 8.12     | 1.70E-07    |
| HALLMARK_HYPOXIA                               | 157  | 12      | 8.07     | 1.83E-07    |
| HALLMARK_ANGIOGENESIS                          | 28   | 6       | 25.16    | 5.68E-07    |
| HALLMARK_MYOGENESIS                            | 121  | 9       | 7.60     | 8.62E-06    |
| HALLMARK_UV_RESPONSE_DN                        | 119  | 7       | 5.78     | 0.000391674 |
| HALLMARK_MTORC1_SIGNALING                      | 159  | 8       | 4.93     | 0.000432202 |
| ANASTASSIOU_MULTICANCER_INVASIVENESS_SIGNATURE | 56   | 28      | 121.08   | 3.06E-41    |
| SCHUETZ_BREAST_CANCER_DUCTAL_INVASIVE_UP       | 305  | 38      | 19.68    | 2.17E-30    |

|                                                |     |    |       |          |
|------------------------------------------------|-----|----|-------|----------|
| POOLA_INVASIVE_BREAST_CANCER_UP                | 218 | 15 | 7.42  | 1.93E-08 |
| CLASPER_LYMPHATIC_VESSELS_DURING_METASTASIS_DN | 30  | 9  | 40.86 | 2.55E-11 |
| SUNG_METASTASIS_STROMA_UP                      | 91  | 9  | 10.41 | 7.91E-07 |

**STable 6. Demographics of TMA patients**

|                                      |                                                              |
|--------------------------------------|--------------------------------------------------------------|
| <b>Sample size (count)</b>           | 396                                                          |
| <b>Age (median + sd)</b>             | 67.3+9.7                                                     |
| <b>Gender</b>                        | Female (186), Male (87), Unknown (123)                       |
| <b>Histological subtype</b>          | MIA(64), AIS(43), LPA(24), MP(14), PAP(56), AC(153), SOL(42) |
| <b># of patients with AURKAScore</b> | 369                                                          |
| <b># of patients with AURKBscore</b> | 169                                                          |

**STable 7. Statistical tests of phenotype changes with aurora kinase inhibitions**

**Linear models dose dependent effect of aurora kinase inhibition for Figure 4e**

| Drug        | Cell line | Invasion assay |          | Migration assay |          | Wound healing assay |          |
|-------------|-----------|----------------|----------|-----------------|----------|---------------------|----------|
|             |           | t-value        | p-value  | t-value         | p-value  | t-value             | p-value  |
| AMG900      | NCI-H1373 | -2.69          | 0.0226   | -2.74           | 0.0209   | -3.67               | 0.0006   |
|             | SK-LU-1   | -3.04          | 0.0125   | -3.72           | 0.0040   | -9.83               | 7.04E-13 |
|             | NCI-H1792 | -3.44          | 0.0063   | -3.10           | 0.0112   | -5.46               | 1.87E-06 |
|             | A549      | -4.80          | 0.0007   | -3.34           | 0.0075   | -5.66               | 1.07E-05 |
|             | NCI-H2009 | -3.50          | 0.0058   | -3.36           | 0.0072   | -14.57              | 7.52E-19 |
| PF-03814735 | NCI-H1373 | -3.06          | 0.0121   | -3.08           | 0.0117   | -1.46               | 0.1584   |
|             | SK-LU-1   | -3.02          | 0.0130   | -3.86           | 0.0032   | -11.36              | 1.13E-10 |
|             | NCI-H1792 | -7.07          | 3.42E-05 | -33.50          | 1.33E-11 | -5.56               | 1.37E-05 |
|             | A549      | -5.26          | 0.0004   | -3.28           | 0.0082   | -3.29               | 0.008    |
|             | NCI-H2009 | -7.18          | 3.01E-05 | -5.64           | 0.0002   | -8.63               | 1.64E-08 |

**Two-side t-test for Supplementary Figure 9a**

| Drug   | Cell line | Invasion assay |         | Migration assay |         | Wound healing assay |            |
|--------|-----------|----------------|---------|-----------------|---------|---------------------|------------|
|        |           | 0.1uM          | 1uM     | 0.1uM           | 1uM     | 0.1uM               | 1uM        |
| AMG900 | NCI-H1373 | 1E-07          | 8.5E-08 | 2E-07           | 1.6E-08 | 0.0019              | 2.068E-06  |
|        | SK-LU-1   | 9E-08          | 2.3E-08 | 7E-07           | 3.6E-08 | 0.0003              | 5.9058E-09 |

|             |           |        |         |        |         |        |            |
|-------------|-----------|--------|---------|--------|---------|--------|------------|
|             | NCI-H1792 | 5E-06  | 1.5E-06 | 2E-08  | 2.4E-09 | 4E-09  | 1.3601E-12 |
|             | A549      | 0.0019 | 0.00044 | 0.0016 | 0.00012 | 0.0021 | 0.00010145 |
|             | NCI-H2009 | 1E-08  | 4E-10   | 1E-06  | 9.7E-08 | 3E-09  | 8.9101E-14 |
| PF-03814735 | NCI-H1373 | 6E-05  | 3.2E-05 | 5E-06  | 1.7E-06 | 0.254  | 0.00231303 |
|             | SK-LU-1   | 4E-06  | 8.8E-07 | 5E-07  | 5E-09   | 0.0004 | 7.4758E-11 |
|             | NCI-H1792 | 6E-05  | 1.2E-07 | 0.0007 | 1.7E-08 | 0.0291 | 3.0711E-07 |
|             | A549      | 0.001  | 3.2E-07 | 0.0003 | 0.00016 | 0.0021 | 0.00053798 |
|             | NCI-H2009 | 3E-06  | 2.9E-10 | 2E-05  | 1.4E-07 | 1E-08  | 1.7689E-08 |

**STable 8. HALLMARK pathways enriched in down-regulated genes by AMG900 treatment**

***A549 cells***

| Geneset                            | Size | Overlap | OddRatio | p-value     | q-value     |
|------------------------------------|------|---------|----------|-------------|-------------|
| HALLMARK_E2F_TARGETS               | 194  | 168     | 42.94    | 1.28E-116   | 6.38E-115   |
| HALLMARK_G2M_CHECKPOINT            | 191  | 152     | 25.72    | 1.45E-94    | 3.63E-93    |
| HALLMARK_MYC_TARGETS_V1            | 193  | 124     | 11.71    | 3.30E-59    | 5.49E-58    |
| HALLMARK_MITOTIC_SPINDLE           | 198  | 100     | 6.57     | 4.40E-35    | 5.50E-34    |
| HALLMARK_MTORC1_SIGNALING          | 195  | 79      | 4.35     | 2.50E-20    | 2.50E-19    |
| HALLMARK_MYC_TARGETS_V2            | 58   | 31      | 7.23     | 1.12E-12    | 9.30E-12    |
| HALLMARK_ANDROGEN_RESPONSE         | 95   | 35      | 3.67     | 1.63E-08    | 1.17E-07    |
| HALLMARK_UNFOLDED_PROTEIN_RESPONSE | 108  | 36      | 3.15     | 1.96E-07    | 1.23E-06    |
| HALLMARK_DNA_REPAIR                | 147  | 40      | 2.35     | 1.38E-05    | 7.68E-05    |
| HALLMARK_ESTROGEN_RESPONSE_LATE    | 191  | 48      | 2.11     | 2.09E-05    | 0.00010425  |
| HALLMARK_PROTEIN_SECRETION         | 94   | 26      | 2.40     | 0.000315891 | 0.001435869 |
| HALLMARK_PI3K_AKT_MTOR_SIGNALING   | 98   | 26      | 2.26     | 0.000636708 | 0.002652949 |
| HALLMARK_UV_RESPONSE_DN            | 138  | 33      | 1.97     | 0.000975424 | 0.00375163  |
| HALLMARK_SPERMATOGENESIS           | 103  | 26      | 2.12     | 0.001411675 | 0.005041697 |

***H1792 cells***

| Geneset                    | Size | Overlap | OddRatio | p-value  | q-value  |
|----------------------------|------|---------|----------|----------|----------|
| HALLMARK_MYC_TARGETS_V1    | 194  | 98      | 7.71     | 1.38E-39 | 6.92E-38 |
| HALLMARK_G2M_CHECKPOINT    | 191  | 95      | 7.46     | 1.10E-37 | 2.75E-36 |
| HALLMARK_E2F_TARGETS       | 195  | 90      | 6.45     | 1.49E-32 | 2.48E-31 |
| HALLMARK_MTORC1_SIGNALING  | 196  | 85      | 5.75     | 2.05E-28 | 2.56E-27 |
| HALLMARK_PROTEIN_SECRETION | 95   | 41      | 5.64     | 2.31E-14 | 2.31E-13 |
| HALLMARK_MITOTIC_SPINDLE   | 198  | 64      | 3.56     | 3.17E-14 | 2.64E-13 |
| HALLMARK_ANDROGEN_RESPONSE | 97   | 40      | 5.21     | 2.94E-13 | 2.10E-12 |

|                                            |     |    |      |             |             |
|--------------------------------------------|-----|----|------|-------------|-------------|
| HALLMARK_UV_RESPONSE_DN                    | 140 | 47 | 3.75 | 1.76E-11    | 1.10E-10    |
| HALLMARK_OXIDATIVE_PHOSPHORYLATION         | 184 | 55 | 3.17 | 6.13E-11    | 3.40E-10    |
| HALLMARK_UNFOLDED_PROTEIN_RESPONSE         | 109 | 39 | 4.13 | 1.03E-10    | 5.17E-10    |
| HALLMARK_GLYCOLYSIS                        | 199 | 57 | 2.99 | 1.76E-10    | 7.99E-10    |
| HALLMARK_EPITHELIAL_MESENCHYMAL_TRANSITION | 197 | 56 | 2.95 | 3.47E-10    | 1.45E-09    |
| HALLMARK_ADIPOGENESIS                      | 194 | 52 | 2.72 | 1.33E-08    | 5.10E-08    |
| HALLMARK_HYPOXIA                           | 194 | 49 | 2.51 | 2.52E-07    | 9.00E-07    |
| HALLMARK_MYC_TARGETS_V2                    | 58  | 22 | 4.52 | 3.67E-07    | 1.22E-06    |
| HALLMARK_PI3K_AKT_MTOR_SIGNALING           | 103 | 30 | 3.04 | 2.33E-06    | 7.29E-06    |
| HALLMARK_ESTROGEN_RESPONSE_EARLY           | 196 | 44 | 2.14 | 2.61E-05    | 7.67E-05    |
| HALLMARK_TGF_BETA_SIGNALING                | 54  | 18 | 3.69 | 3.30E-05    | 9.16E-05    |
| HALLMARK_NOTCH_SIGNALING                   | 32  | 13 | 5.04 | 3.86E-05    | 0.000101647 |
| HALLMARK_HEME_METABOLISM                   | 194 | 41 | 1.98 | 0.000196865 | 0.000492161 |
| HALLMARK_DNA_REPAIR                        | 148 | 33 | 2.12 | 0.000286098 | 0.000681187 |
| HALLMARK_FATTY_ACID_METABOLISM             | 157 | 34 | 2.04 | 0.00041426  | 0.000941501 |
| HALLMARK_CHOLESTEROL_HOMEOSTASIS           | 73  | 19 | 2.60 | 0.000761123 | 0.001654616 |
| HALLMARK_ESTROGEN_RESPONSE_LATE            | 197 | 39 | 1.82 | 0.001061313 | 0.002211068 |
| HALLMARK_PEROXISOME                        | 104 | 23 | 2.09 | 0.002491419 | 0.004982838 |
| HALLMARK_WNT_BETA_CATENIN_SIGNALING        | 42  | 12 | 2.95 | 0.002978549 | 0.00572798  |
| HALLMARK_TNFA_SIGNALING_VIA_NFKB           | 199 | 37 | 1.69 | 0.004295077 | 0.007953846 |
| HALLMARK_APOPTOSIS                         | 160 | 31 | 1.77 | 0.004553919 | 0.008131998 |

**STable 9. Plasmid DNAs used for CRISPR cloning**

| Plasmid                    | Source                  | Identifier |
|----------------------------|-------------------------|------------|
| psPAX2                     | Addgene                 | 12260      |
| pMD2.G                     | Addgene                 | 12259      |
| lentiCas9-Blast            | Addgene                 | 52962      |
| hUBCp_Cas9_3xNLS_p2a_puroR | Addgene                 | 81251      |
| pLKO.1 -GFP                | Brown Laboratory, ISMMS | N/A        |
| pLKO.1 -mCherry            | Addgene                 | 128073     |

**STable 10. Plasmid DNAs used for CRISPR cloning**

|                    | <b>sgRNA Target Sequence</b> | <b>PAM sequence</b> |
|--------------------|------------------------------|---------------------|
| AURKA_sgRNA#1      | CCATATAGAAAATAATCCTG         | AGG                 |
| AURKA_sgRNA#2      | CCTGAAAACCTACCGAAGGT         | GGG                 |
| AURKB_sgRNA#1      | CATCAACCCATACTGCAGGT         | GGG                 |
| AURKB_sgRNA#2      | TCTTTCCGGAGGACTCGCTG         | GGG                 |
| Non-target_sgRNA#1 | AAAAAGCTCCGCCTGATGG          | N/A                 |



## Supplementary Notes

### Supplementary Note 1. Unsupervised clustering of the 53 early-stage lung adenocarcinoma into Invasive and Indolent tumors

First, we performed an unsupervised hierarchical clustering for the 53 histologically heterogeneous LUAD using 1000 most variable genes (SFig. 1a, left). The unsupervised hierarchical clustering resulted in two distinct groups containing 20 and 33 samples, respectively. Samples in each group were mostly consistent with their histological subtypes; Group 1 on the left (red color in Inv. Class) was mostly aggressive tumors AC, MP, PAP and SOL while Group 2 on the right side (blue color in non-Inv. Class) was generally known to be non-invasive tumors such as MIA, AIS, and LPA. Therefore, we annotated Group 1 as “Invasive” and Group 2 as “Indolent”. Then, differentially expressed genes (DEGs) between the Invasive and Indolent groups were determined based on t-test and a signature of 1,214 genes was obtained based on cutoffs (fold-change (FC) > 1.5 and FDR < 0.01, SFig. 1a, right). When the samples were re-clustered using the 1,214 DEGs, one sample was switched from Indolent to Invasive group. DEGs were refined based on updated groups (21 Invasive vs. 32 Indolent tumors) and the 1,322 DEGs were finally identified, (Fig. 1a, Supplementary Data 1). Further re-clustering samples based on the updated DEGs yielded no additional group member change.

### Supplementary Note 2. The signature genes independent from sex and smoking status

Because our dataset included a higher proportion of female patients (63%, Supplementary Table 1) that reflects current lung cancer epidemiology, we tested whether the signature genes were influenced by sex difference. Only 1 out of 1,322 genes was significantly associated with sex (FDR < 0.01, Supplementary Note Fig. 1a). Cigarette smoking is the major cause of lung adenocarcinoma<sup>1</sup>. Since smoking status of the 53 patients was not available, we used RNAseq profiles of the CPTAC LUAD dataset to test whether the genes were associated with smoking status<sup>2</sup>. Sixty-one samples with stage I and II were separated into 22 more invasive and 39 less

invasive tumors based on unsupervised clustering using our signature genes and smoking status of the patients in each group was similar (Chi-square test  $p=0.77$ , Supplementary Note Fig. 1b) suggesting that the smoking status is not associated with the invasiveness signature genes. This result is consistent with a recent report that the smoking signature activity did not differ between AIS/MIA and invasive LUADs<sup>3</sup>. Taken together, gene expression variances of the invasiveness signature genes were not significantly associated with sex nor smoking status of the patients.

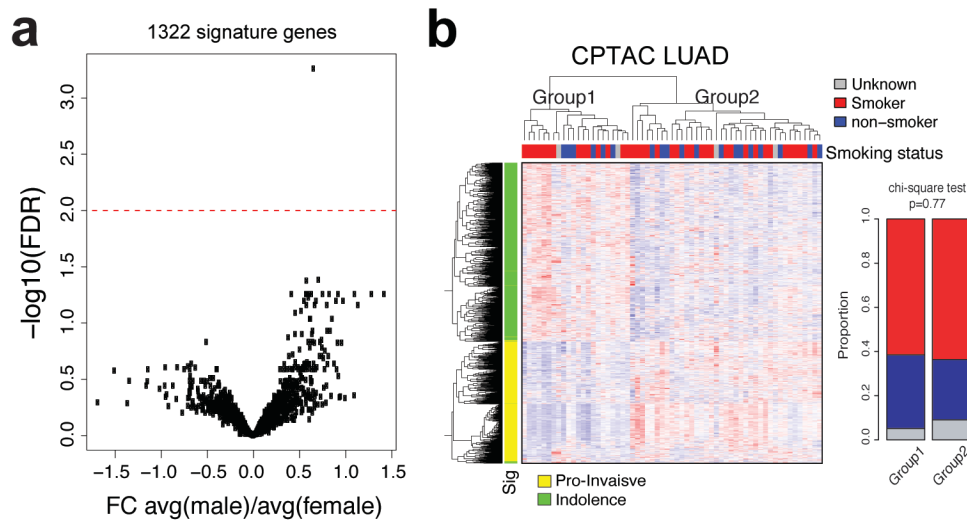

**Supplementary Note Fig. 1. Expression of the signature genes independent from sex or smoking status of patients.** **A.** The association of expression of 1322 genes with sex of 53 patients. Two-side t-test p-values between male and female were adjusted (FDR) and only one gene was significant ( $FDR < 0.01$ ). **b.** CPTAC LUAD samples (stage I and II tumors) clustered by the signature genes. Proportions of smokers were similar in both groups (chi-square test  $p$ -value= $0.77$ ).

### Supplementary Note 3. Comparison of functional enrichments based on the invasive signature or histology-based DEGs

Unsupervised clustering based on gene expression profiles provided a greater number of differentially expressed genes between invasive and indolent tumors than histology-based clustering. To test whether the increased genes are biologically meaningful, we evaluated FET  $p$ -

values against gene sets in Fig. 1d using the histology based DEGs (SFig. 1c) and compared them with the results using our signature genes. Because most of histology based DEGs were included in the signature genes (Fig. 1c), it was somewhat expected to observe similar enrichment patterns from the approaches (SFig. 1f). Several gene sets were similarly enriched for genes by both approaches including cell cycle related gene sets (FET  $p=2.9\times 10^{-52}$  and  $2.2\times 10^{-51}$  for G2M\_CHECKPOINT,  $1.1\times 10^{-52}$  and  $7.8\times 10^{-50}$  for E2F\_TARGETS from our signature genes and histology-based DEGs, respectively). However, the pro-invasive and indolence signatures showed more significant associations with gene sets specific for EMT (FET  $p=9.9\times 10^{-29}$  and  $5.8\times 10^{-14}$  from pro-invasive and histology-based DEGs, respectively, SFig. 1f), Invasion (FET  $p=1.5\times 10^{-25}$  and  $2.6\times 10^{-13}$ , respectively), or tumor suppressor genes (FET  $p=3.5\times 10^{-8}$  and  $7.1\times 10^{-5}$  from indolent and histology-based DEGs, respectively, SFig. 1f). This indicates that the biological information revealed by the invasiveness signature supplements the mechanistic and prognostic information provided histology alone DEGs. Moreover, when we exclusively included genes in the invasiveness signature DEGs but not in histology-based DEGs, significant enrichments were still observed for some of key pathways such as EMT or tumor suppressor genes (SFig. 1g). These results support our rationale to use the invasiveness signature genes from gene expression based clustering to biologically and functionally classify early lung adenocarcinoma specimens.

## Supplementary Methods

### Quality control of RNAseq data

Raw data (in fastq format) of 53 samples were processed through Tophat and Cufflink<sup>4</sup> using hg19 reference genome and UCSC refseq gtf. The average number of reads per samples is 45 million reads with the minimum around 28 million (Supplementary Method Fig. 1a). The FPKM of 18,457 genes estimated by Cufflink showed median expression of 3 ( $\log_2(\text{FPKM})$ ) (Supplementary Method Fig. 1b). Using the processed FPKM value, we confirmed that sex of each patient was consistent with predicted sex based on expression of *RPS4Y1*, a sex-specific gene on Y chromosome<sup>5</sup> (Supplementary Method Fig. 1c).

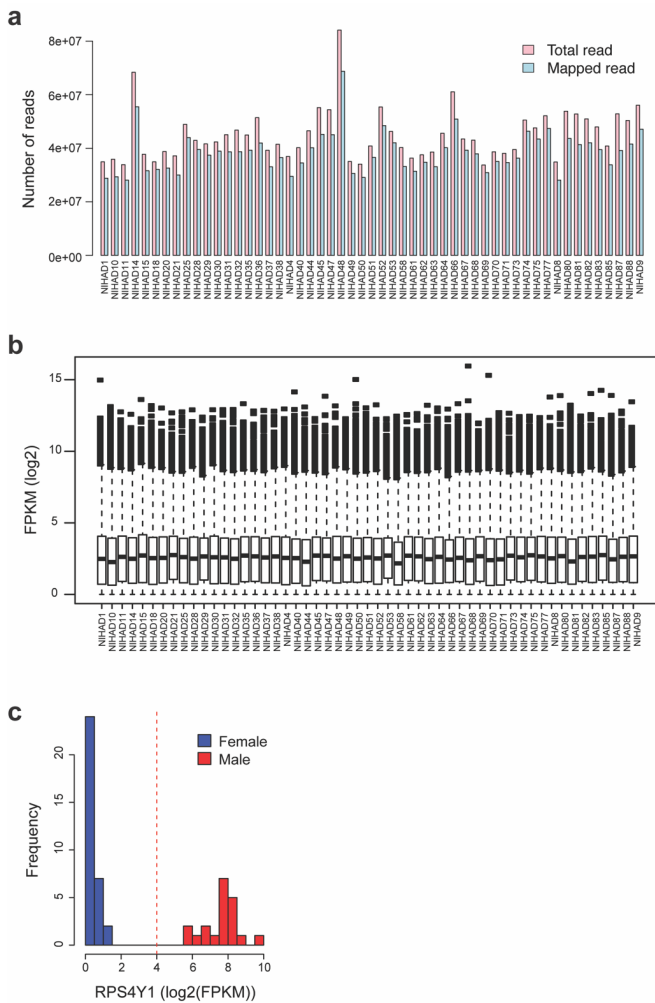

**Supplementary Method Fig. 1. Quality check of RNAseq data of 53 esLUAD patients.** **a.** A barplot of number of reads; total number of reads (red) and uniquely mapped reads to the reference genome (blue). **b.** A boxplot showing gene expression distribution of 18457 genes in each sample. Band indicates median value of  $\log_2(\text{FPKM})$  and the box edges are the 25<sup>th</sup> and 75<sup>th</sup> percentiles for each sample. Whiskers indicate maximum and minimum values of each group except for outliers. **c.** Expression distributions of sex-specific gene *RPS4Y1* based on sex reported in clinical data.

### **Patient-centric multi-Omics data QC for CNV, DNA methylation and RNAseq data from TCGA LUAD stage I data**

While integration of different molecular data enhances our understanding of molecular mechanisms underlying complex biological systems, large scale omics data sometimes contain sample labeling errors<sup>5</sup>. Therefore, we performed sample alignment to filter out any potential mis-labeled samples among CNV, methylation and RNAseq data from TCGA before we used them for network construction. We collected 218 samples with CNV, methylation, and RNAseq profiles available and performed pairwise alignment between RNAseq-CNV and RNAseq-methylation using MODMatcher<sup>5</sup>. For each pairwise alignment, we first measured the correlation of cis genes between two molecular data and identified top 1000 most significant gene; positively associated genes in RNAseq-CNV and negatively associated genes in RNAseq-methylation. Then, values of the selected cis genes were rank-transformed, and sample-wise correlation were measured as sample similarity score. If a sample is well aligned between two molecular data, the sample similarity score is expected to be higher than random pairing as shown in an example (Supplementary Method Fig. 2a). We confirmed samples between RNAseq and CNV had perfectly aligned each other. From the RNAseq-methylation alignment, sample similarity scores of two samples (TCGA-49-4514-01A and TCGA-97-8177-01A) were not clearly separated from null distribution (Supplementary Method Fig. 2b-c) so we removed these in further analysis.

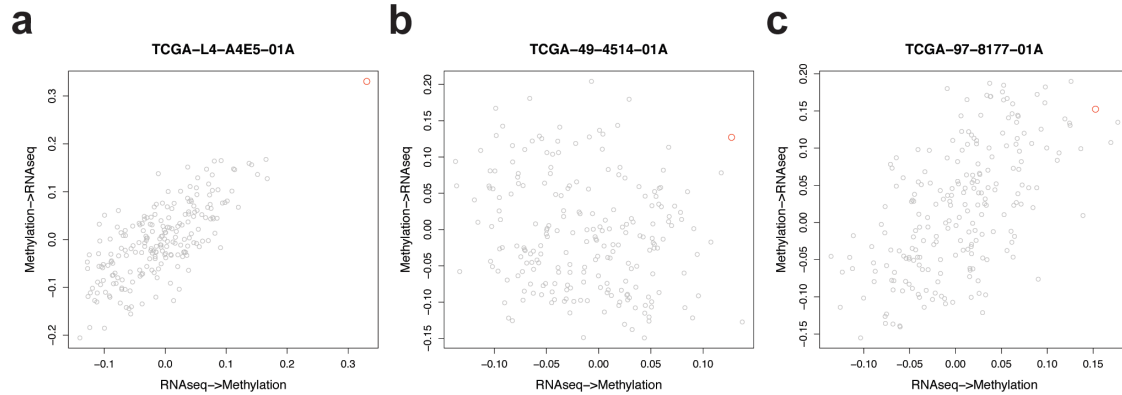

### Supplementary Method Fig. 2. Sample similarity scores from RNAseq-methylation

**alignment. a.** An example of well-aligned case. The red dot (self-similarity score) is distinctly separated from sample score with other samples. **b.** Ambiguous sample (TCGA-49-4514-01A) with poor self-similarity score compared with other samples. **c.** Ambiguous sample (TCGA-97-8177-01A) with poor self-similarity score.

### Preparation for network construction

The 216 samples confirmed by sample alignment were further used to construct a Bayesian network of esLUAD<sup>6,7</sup>. First, we selected genes with higher expression ( $\log_2(\text{RSEM}) > 4.5$ , Supplementary Method Fig. 3a) and larger variances (variance  $> 0.6$ , Supplementary Method Fig. 3b). A total of 8,533 informative genes with detectable expression levels and large variances across samples were selected to be included in the network reconstruction process (Supplementary Method Fig. 3c). Among them, the expression of 3,476 and 761 genes was cis-regulated by CNVs or promoter methylation (FDR  $< 0.01$ ), respectively, and cis-CNVs and cis-methylations were included as root nodes in the network construction.

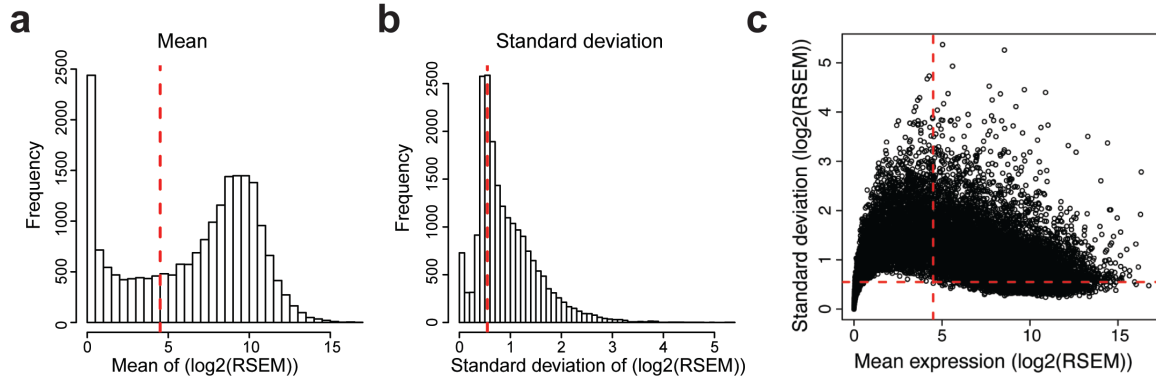

**Supplementary Method Fig. 3. Selection of genes for network reconstruction.** **a.** Higher expressed genes were first selected (mean expression > 4.5). **b.** Genes with little variances were filtered out due to less information (variance > 0.6). **c.** Scatter plot of mean expression and variance of all genes.

### Western blot

For synchronization, cells were treated with 400ng/ml nocodazole for 16-20hr and were harvested to obtain total protein extract for Western blot. Whole cell protein extract was prepared from cells using RIPA lysis buffer (Thermo Scientific). Protein concentration was estimated using Pierce BCA protein assay kit (Thermo Scientific) and 40 $\mu$ g of protein was boiled in Laemmli's SDS sample buffer (Boston bioproducts) to run on SDS-PAGE gel. Protein was electro-transferred to PVDF membrane, blocked with 5% non-fat powdered milk (Boston bioproducts), followed by overnight incubation with primary antibody at 4°C. The membrane was washed thrice with 0.05% Tris-buffered saline Tween-20 (TBST) wash buffer for 10 min each and incubated with HRP-conjugated secondary antibody. Membrane was then washed three times with TBST and developed with Clarity Western ECL substrate (Bio-Rad Laboratories). The activities of AURKA and AURKB, measured as expression

of p-Aur-A (T288) and pAur-B (T232) was significantly suppressed in all 3 cell lines with both drugs (Supplementary Method Fig. 4a-c).

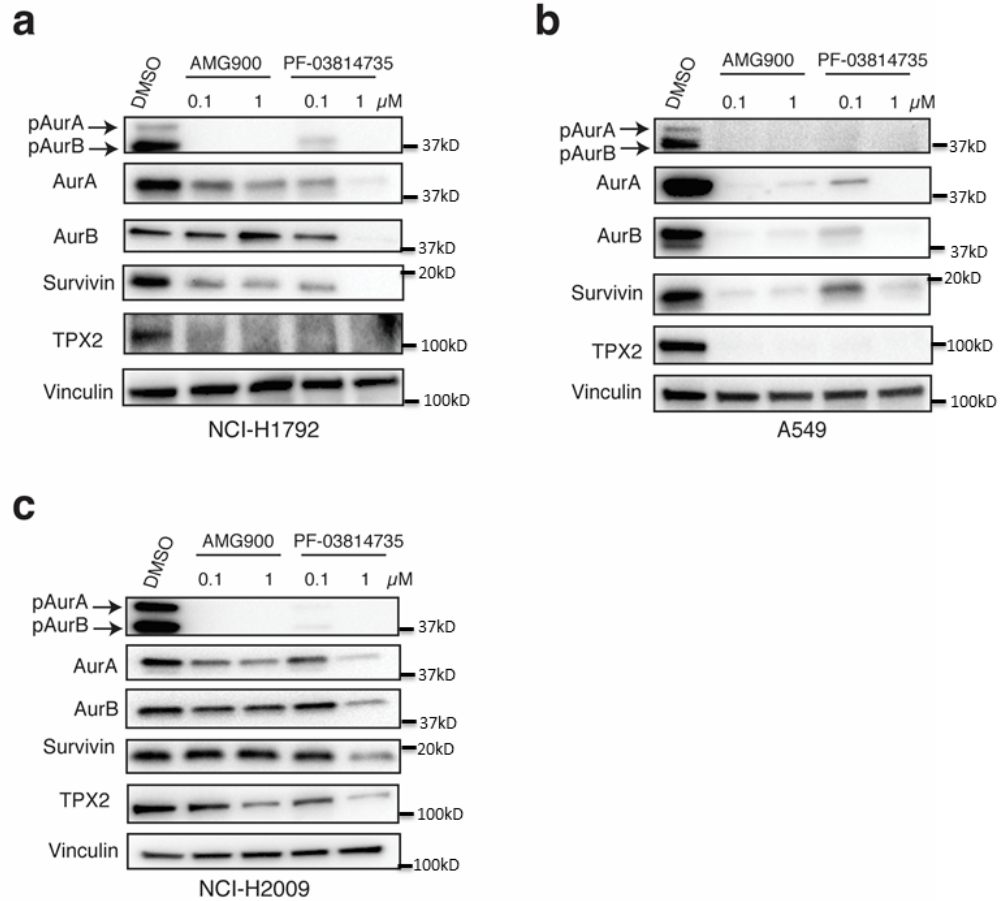

**Supplementary Method Fig. 4. Pan aurora kinase inhibitors suppress aurora kinases activity of invasive LUAD cells a-c.** Western blot for indicated proteins expression in **a.** H1792, **b.** A549 and **c.** H2009 on treatment with indicated concentrations of AMG900 and PF-03814735 at 48hr.

### CD31, E-Cadherin and Vimentin Immunohistochemistry and Masson's Trichrome staining



Immunohistochemistry for CD31 in mouse lung sections was performed on Leica Bond III with antigen retrieval for 10 minutes using citrate buffer (pH6). Slides were then incubated with primary antibody for 30 minutes at room temperature and detected using an HRP conjugated compact polymer system with DAB as the chromogen and was counterstained with hematoxylin.

Immunohistochemistry for E-cadherin (retrieval Tris-EDTA buffer pH9) was performed on 5 micron sections using a Leica Bond II autostainer. Twelve regions of interest were imaged per condition (vehicle and AMG900 treatment) and analyzed using the IHC Profiler and plugin for Image J.

For immuno-histochemical staining for pAKT, sections were deparaffinized, rehydrated with xylene and descending grades of alcohol and water. For antigen retrieval slides were boiled in Antigen Unmasking Solution (Vector Labs, CA) for 30 min in a steamer. After cooling, slides were incubated for 5 min in 3% H<sub>2</sub>O<sub>2</sub> (in ethanol) to quench endogenous peroxidase activity. Blocking was performed using the Vectastain ABC Elite Kit (Vector labs, CA). Sections were incubated with the primary antibodies overnight at 4°C. Sections were washed and incubated with appropriate secondary antibodies from the ABC kit and staining was revealed using the ImmPACT DAB kit (Vector Labs, CA). Slides were counterstained in hematoxylin, dehydrated and mounted. For collagen quantitation, lung sections were stained with trichrome stain as described previously<sup>8</sup>. For each tumor, trichrome positive area was marked using Aperio ImageScope 12.1 software. Collagen positive area was normalized to tumor area for each section and plotted.

## **Viability assay**

For IC<sub>50</sub> 1-2 X 10<sup>3</sup> cells were seeded in triplicate wells in a 96-well plate for treatment with serial dilutions of AMG900 (Apexbio) and PF-03814735 (Apexbio). Effect of both drugs on the viability of lung adenocarcinoma cells was tested at 48h after drug treatment using alamarBlue™ Cell Viability Reagent. IC<sub>50</sub> value for the effect of drugs on cell viability was calculated by plotting log inhibitor vs normalized response- variable slope. Additionally, all cells treated with aurora kinase inhibitors demonstrated suppressed proliferation rate over the course of longer time duration (Supplementary Method Fig. 5).

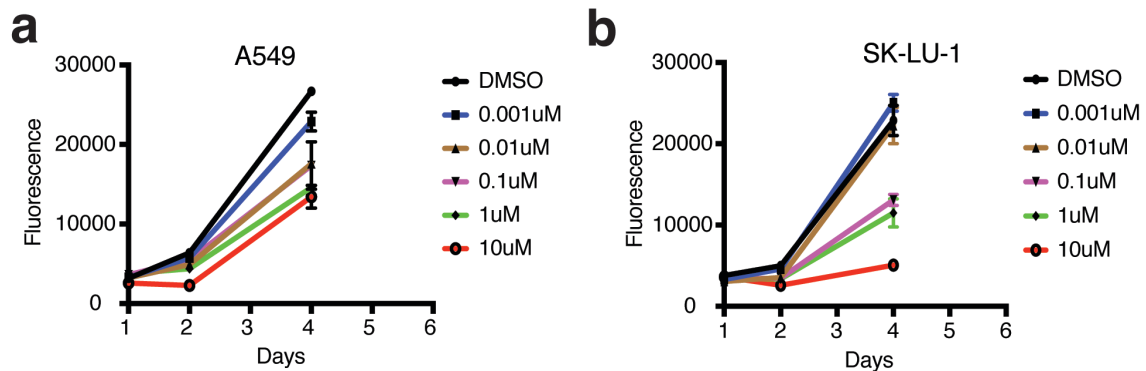

**Supplementary Method Fig. 5. Cell growth rate is suppressed over long term with aurora kinase inhibitors.** Cell growth assay shown as relative fluorescence of A549 (a) and SK-LU-1 cells (b) treated with DMSO vs serial dilution of AMG900 or PF-03814735 measured through alamar blue assay at Day1, 2, and 4. n=3, Data presented as mean ±s.e.m.

List of antibodies used for western blot analysis and IHC is in Supplementary Method Table 1.

**Supplementary Method Table 1. List of antibodies**

| Antibody | Source | Dilution used | Identifier |
|----------|--------|---------------|------------|
|----------|--------|---------------|------------|

|                          |                           |          |           |
|--------------------------|---------------------------|----------|-----------|
| Aurora A (WB)            | Cell Signaling Technology | 1:1000   | 14475     |
| Aurora A (IHC)           | Abcam                     | 1:400    | ab13824   |
| Aurora B/AIM1 (WB)       | Cell Signaling Technology | 1:1000   | 3094      |
| Aurora B (IHC)           | Abcam                     | 1:100    | ab2254    |
| CD31 (IHC)               | Abcam                     | 1:100    | ab182981  |
| p-Aurora A/B/C           | Cell Signaling Technology | 1:2000   | 2914      |
| E-Cadherin (IHC)         | Abcam                     | 1:1000   | ab53033   |
| TPX2                     | Cell Signaling Technology | 1:1000   | 8559      |
| TPX2                     | Novus                     | 1:1000   | NB500-179 |
| Survivin                 | Cell Signaling Technology | 1:1000   | 2808      |
| p-Akt                    | Cell Signaling Technology | 1:1000   | 13038     |
| Akt                      | Cell Signaling Technology | 1:1000   | 9272      |
| pAKT (IHC)               | Cell Signaling Technology |          | 4060      |
| p-ERK1/2                 | Cell Signaling Technology | 1:1000   | 9101      |
| ERK1/2                   | Cell Signaling Technology | 1:1000   | 4695      |
| p-mTOR                   | Cell Signaling Technology | 1:1000   | 5536      |
| mTOR                     | Cell Signaling Technology | 1:1000   | 2983      |
| p-p70 S6 Kinase (Ser371) | Cell Signaling Technology | 1:1000   | 9208      |
| p-p70 S6 Kinase (Thr389) | Cell Signaling Technology | 1:1000   | 9234      |
| p-4E-BP1                 | Cell Signaling Technology | 1:1000   | 2855      |
| E-Cadherin               | Cell Signaling Technology | 1:1000   | 3195      |
| N-Cadherin               | Cell Signaling Technology | 1:1000   | 13116     |
| Vimentin                 | Cell Signaling Technology | 1:1000   | 5741      |
| Claudin-1                | Cell Signaling Technology | 1:1000   | 13255     |
| Slug                     | Cell Signaling Technology | 1:1000   | 9585      |
| Snail                    | Cell Signaling Technology | 1:1000   | 3879      |
| $\beta$ -Actin           | Sigma                     | 1:5000   | A5316     |
| Vinculin                 | Sigma                     | 1:20,000 | V4505     |

**Uncropped blots for Supplementary Figures**

**SFig. 7a** Western blot for H1792 cells transduced with indicated sgRNAs

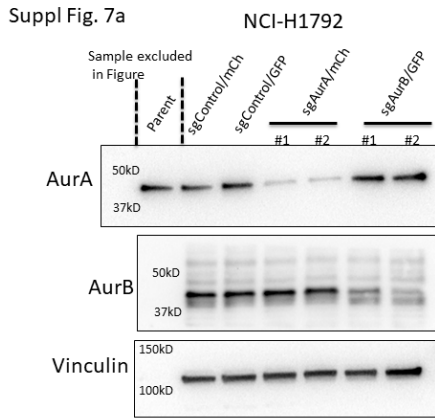

**SFig. 8a** Western blot for H1792 cells transduced with indicated sgRNAs

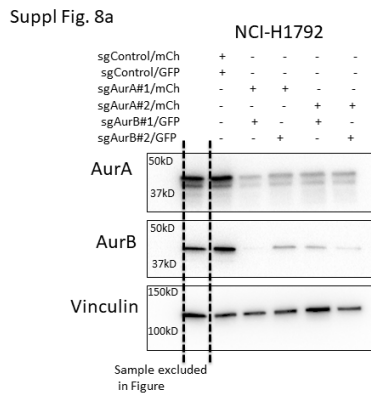

**SFig. 8e** Western blot for H1792 cells transduced with indicated sgRNAs at day 2 and day8

Suppl Fig. 8e

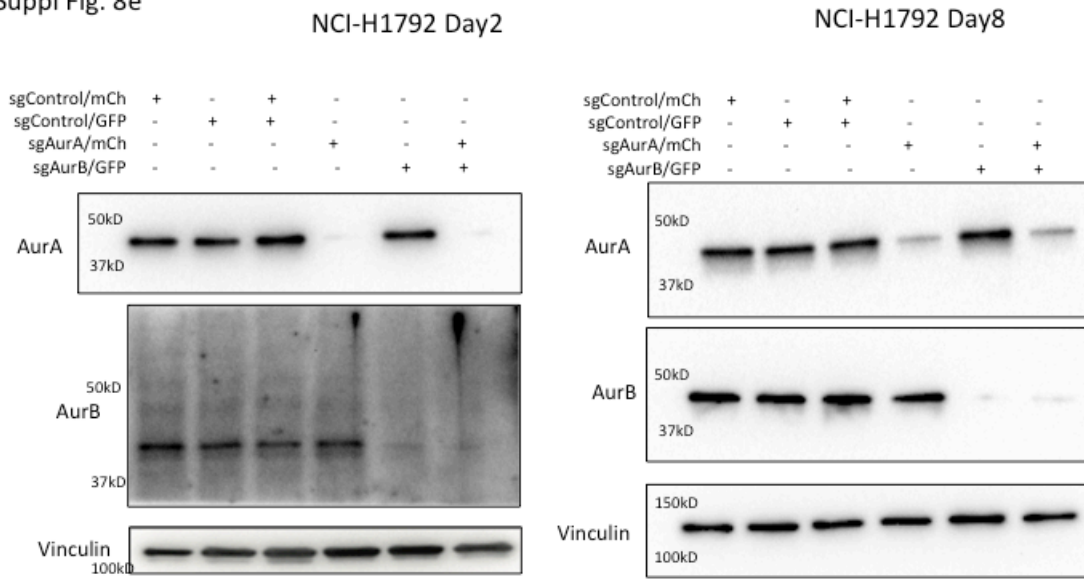

**SFig. 10d** Western blot for indicated proteins in H1792 cells treated with DMSO and indicated concentrations of AMG900 for 48hr.

SFig. 10d

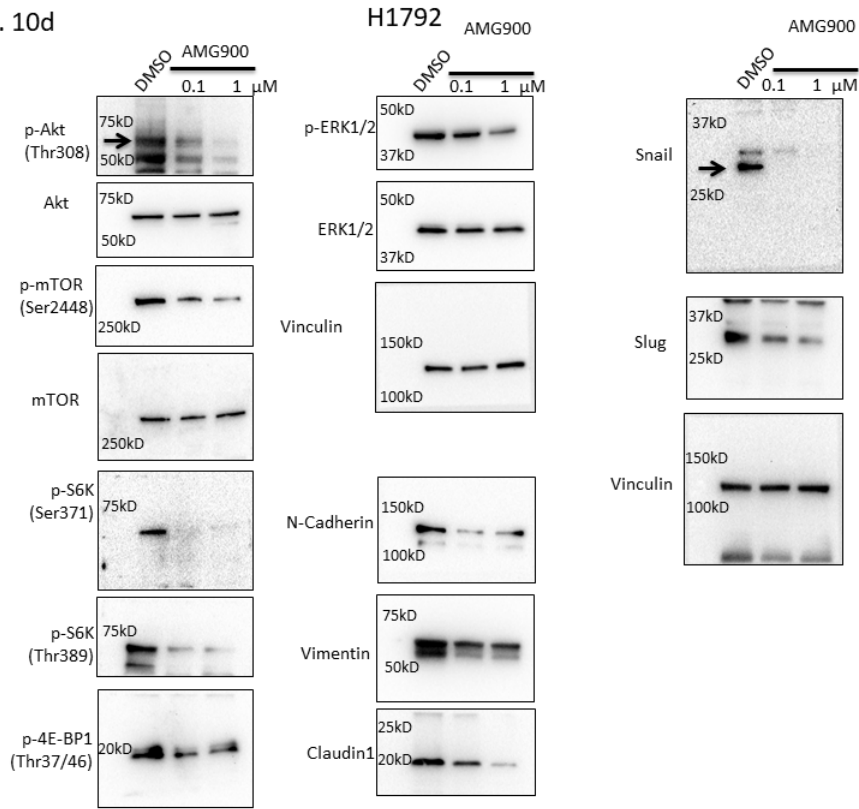

**SFig. 10e** Western blot for H1792 cells treated with indicated sgRNAs for AKT/mTOR and EMT pathway.

SFig. 10e

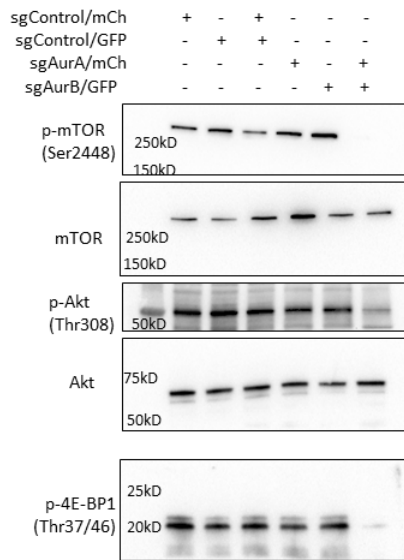

H1792

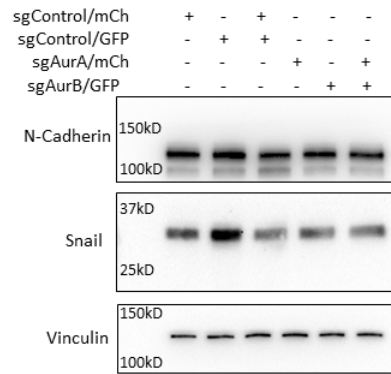

## Supplementary References

1. Cancer Genome Atlas Research N. Comprehensive molecular profiling of lung adenocarcinoma. *Nature* 2014;511:543-50.
2. Gillette MA, Satpathy S, Cao S, et al. Proteogenomic Characterization Reveals Therapeutic Vulnerabilities in Lung Adenocarcinoma. *Cell* 2020;182:200-225 e35.
3. Chen H, Carrot-Zhang J, Zhao Y, et al. Genomic and immune profiling of pre-invasive lung adenocarcinoma. *Nat Commun* 2019;10:5472.
4. Trapnell C, Roberts A, Goff L, et al. Differential gene and transcript expression analysis of RNA-seq experiments with TopHat and Cufflinks. *Nat Protoc* 2012;7:562-78.
5. Yoo S, Huang T, Campbell JD, et al. MODMatcher: multi-omics data matcher for integrative genomic analysis. *PLoS Comput Biol* 2014;10:e1003790.
6. Zhu J, Zhang B, Smith EN, et al. Integrating large-scale functional genomic data to dissect the complexity of yeast regulatory networks. *Nat Genet* 2008;40:854-61.
7. Liu Y, Yu H, Yoo S, et al. A Network Analysis of Multiple Myeloma Related Gene Signatures. *Cancers (Basel)* 2019;11.
8. Borczuk AC, Sole M, Lu P, et al. Progression of human bronchioloalveolar carcinoma to invasive adenocarcinoma is modeled in a transgenic mouse model of K-ras-induced lung cancer by loss of the TGF-beta type II receptor. *Cancer Res* 2011;71:6665-75.
