# Supplementary material for: Integrative network analysis of early-stage lung adenocarcinoma identifies aurora kinase inhibition as interceptor of invasion and progression
Source: PubMed Central journal article supplement (PMC8948234; doi:10.1038/s41467-022-29230-7), 2022-03-24
Supplement: 41467_2022_29230_MOESM3_ESM.pdf [file 41467_2022_29230_MOESM3_ESM.pdf]

## **Supplementary Data Legends**

**Supplementary Data 1.** List of 1322 DEGs between invasive and non-invasive tumors

**Supplementary Data 2.** Enrichment test against GO terms using pro-invasive and indolent signatures

**Supplementary Data 3.** Enrichment test against Hallmark and selected C2 gene sets using invasive and non-invasive signatures

**Supplementary Data 4.** Differentially expressed genes determined by DEseq2 (FDR<0.01)
